# Supplementary material for: In silico design to enhance the barrier height for magnetization reversal in Dy(iii) sandwich complexes by stitching them under the umbrella of corannulene
Source: Royal Society of Chemistry journal article supplement (doi:10.1039/d1sc03160k), 2021-01-01
Supplement: d1sc03160k1.pdf [file d1sc03160k1.pdf]

## **In Silico Design to Enhance the Barrier height for Magnetization Reversal in Dy(III) Sandwich Complexes by Stitching them Under the Umbrella of Corannulene**

Tanu Sharma<sup>†</sup>, Mukesh Kumar Singh<sup>†</sup>, Radhika Gupta, Munmun Khatua and Gopalan Rajaraman<sup>\*</sup>

<sup>†</sup>Both authors have equal contributions

Department of Chemistry, Indian Institute of Technology Bombay, Mumbai-400076, India.  
E-mail: [rajaraman@chem.iitb.ac.in](mailto:rajaraman@chem.iitb.ac.in); Tel: +91-22-2576-7187

## Contents

|                                                                                                                                                                                                                                                                                                                                                  |         |
|--------------------------------------------------------------------------------------------------------------------------------------------------------------------------------------------------------------------------------------------------------------------------------------------------------------------------------------------------|---------|
| <b>Table S1:</b> DFT optimized xyz coordinates for models <b>1-6</b> .                                                                                                                                                                                                                                                                           | S3-S8   |
| <b>Table S2:</b> Frequencies of optimized structures 1-6.                                                                                                                                                                                                                                                                                        | S8-S12  |
| <b>Figure S1</b>                                                                                                                                                                                                                                                                                                                                 | S13     |
| <b>Table S3.</b> Bond critical point (BCP) properties for Models <b>1-6</b> .                                                                                                                                                                                                                                                                    | S13-S14 |
| <b>Table S4.</b> Energy Decomposition Analysis of model 1-6.                                                                                                                                                                                                                                                                                     | S14     |
| <b>Figure S2:</b> <i>Ab initio</i> SINGLE_ANISO computed ground state KD orientation for (a-f) Models 1-6, respectively, along with the computed LoProp charges on the important atoms.                                                                                                                                                          | S15     |
| <b>Table S5:</b> Thermally accessible structures at different time steps (in fs) for models <b>3,5</b> , and <b>6</b> , along with their relative energies ( $\Delta E$ ), $U_{\text{cal}}$ and magnetic relaxation mode.                                                                                                                        | S15-S16 |
| <b>Table S6:</b> CASSCF+RASSI-SO computed relative energies of eight low lying KDs and $g$ tensors of eight low lying KDs for thermally accessible structures of Models 3,5 and 6, along with the matrix element of the transverse moment for QTM (quantum tunnelling of the magnetisation), TA-QTM (thermally assisted QTM) and Orbach process. | S16-S23 |
| <b>Figure S3.</b> Magnetic blockade diagrams for, (a) 3-10 (b) 3-7 (c) 5-5, (d) 5-1, (e) 6-19, (f) 6-10, (g) 6-17                                                                                                                                                                                                                                | S23     |
| <b>Figure S4.</b> Plots showing the crystal field parameters for complex <b>3</b> .                                                                                                                                                                                                                                                              | S24     |
| <b>Table S7.</b> CASSCF+RASSI-SO computed energies of all low-lying KDs, and SINGLE_ANISO computed $g$ -tensors of <b>3</b> at the displacement, $\chi_j\left(\frac{1}{\sqrt{\mu_j}}a.u.\right) = 0.00$ , <b>0.5</b> , <b>1.0</b> , ( <b>-0.5</b> ) and ( <b>-1.0</b> )                                                                          | S24-S26 |
| <b>Input</b> for optimisation, Molcas and BOMD                                                                                                                                                                                                                                                                                                   | S27-S37 |

**Table S1.** DFT optimized xyz coordinates for models **1-6**.[[ $\eta^5$ -corannulene]Dy(Cp)] (**1**)

|    |              |              |              |
|----|--------------|--------------|--------------|
| Gd | -1.234619000 | 0.002090000  | -0.874692000 |
| C  | 1.249057000  | 3.063831000  | 1.616429000  |
| H  | 1.303390000  | 3.863909000  | 2.349123000  |
| C  | 1.888057000  | 3.255058000  | 0.388365000  |
| H  | 2.408384000  | 4.194670000  | 0.225845000  |
| C  | 2.952646000  | 2.021476000  | -1.662899000 |
| H  | 3.557367000  | 2.863096000  | -1.988455000 |
| C  | 3.233212000  | 0.764470000  | -2.204856000 |
| H  | 4.042989000  | 0.689509000  | -2.924994000 |
| C  | 3.022058000  | -1.813891000 | -1.796806000 |
| H  | 3.814507000  | -2.093004000 | -2.485344000 |
| C  | 2.559668000  | -2.782582000 | -0.902599000 |
| H  | 3.014653000  | -3.768285000 | -0.939144000 |
| C  | 1.369147000  | -3.140562000 | 1.402699000  |
| H  | 1.730850000  | -4.154218000 | 1.550040000  |
| C  | 0.802329000  | -2.481529000 | 2.497267000  |
| H  | 0.751045000  | -3.015065000 | 3.442101000  |
| C  | 0.268023000  | -0.126813000 | 3.509165000  |
| H  | 0.173471000  | -0.473311000 | 4.534412000  |
| C  | 0.377629000  | 1.249477000  | 3.290349000  |
| H  | 0.362933000  | 1.905592000  | 4.156038000  |
| C  | 0.651865000  | 1.805162000  | 1.987829000  |
| C  | 1.997106000  | 2.208147000  | -0.598395000 |
| C  | 2.588159000  | -0.438953000 | -1.739777000 |
| C  | 1.614557000  | -2.479392000 | 0.144634000  |
| C  | 0.419995000  | -1.092495000 | 2.448584000  |
| C  | 0.475967000  | -0.529364000 | 1.168223000  |
| C  | 0.587129000  | 0.873391000  | 0.944651000  |
| C  | 1.240256000  | 1.068135000  | -0.305651000 |
| C  | 1.523060000  | -0.212586000 | -0.860242000 |
| C  | 1.054401000  | -1.199843000 | 0.054038000  |
| C  | -3.120329000 | 0.309848000  | 0.881637000  |
| C  | -3.448230000 | 1.203327000  | -0.176147000 |
| C  | -3.794510000 | 0.425690000  | -1.318056000 |
| C  | -3.682735000 | -0.947779000 | -0.965152000 |
| C  | -3.261019000 | -1.021407000 | 0.392437000  |
| H  | -2.855690000 | 0.590320000  | 1.894029000  |
| H  | -3.486962000 | 2.284954000  | -0.107470000 |
| H  | -4.144302000 | 0.811982000  | -2.269293000 |
| H  | -3.928671000 | -1.790247000 | -1.602593000 |
| H  | -3.133328000 | -1.928571000 | 0.971687000  |

[[ $\eta^5$ -corannulene]Dy(C<sub>6</sub>H<sub>6</sub>)] (**2**)

|    |              |              |              |
|----|--------------|--------------|--------------|
| Gd | 1.434798000  | -0.133260000 | -0.027496000 |
| C  | -2.134888000 | 1.688311000  | 2.805553000  |
| H  | -2.540670000 | 2.451150000  | 3.464569000  |
| C  | -2.128350000 | 0.360752000  | 3.253521000  |
| H  | -2.510287000 | 0.148885000  | 4.249193000  |

|   |              |              |              |
|---|--------------|--------------|--------------|
| C | -2.194450000 | -2.101097000 | 2.457592000  |
| H | -2.639584000 | -2.478235000 | 3.374773000  |
| C | -2.215033000 | -2.943496000 | 1.315788000  |
| H | -2.664504000 | -3.928317000 | 1.417493000  |
| C | -2.251940000 | -2.949649000 | -1.264060000 |
| H | -2.699562000 | -3.936957000 | -1.348788000 |
| C | -2.267361000 | -2.112268000 | -2.407997000 |
| H | -2.738346000 | -2.493593000 | -3.310364000 |
| C | -2.223252000 | 0.347360000  | -3.218613000 |
| H | -2.629624000 | 0.129877000  | -4.203278000 |
| C | -2.216209000 | 1.674441000  | -2.778392000 |
| H | -2.635416000 | 2.435867000  | -3.430545000 |
| C | -2.149040000 | 3.211774000  | -0.682062000 |
| H | -2.528512000 | 4.087543000  | -1.201490000 |
| C | -2.126831000 | 3.215932000  | 0.702016000  |
| H | -2.488247000 | 4.095316000  | 1.228267000  |
| C | -1.759372000 | 2.032036000  | 1.467998000  |
| C | -1.758923000 | -0.747237000 | 2.379972000  |
| C | -1.808399000 | -2.472919000 | 0.020174000  |
| C | -1.832114000 | -0.757836000 | -2.348337000 |
| C | -1.805285000 | 2.025169000  | -1.450466000 |
| C | -1.204758000 | 0.982075000  | -0.705843000 |
| C | -1.181535000 | 0.985829000  | 0.711558000  |
| C | -1.173749000 | -0.365536000 | 1.159411000  |
| C | -1.197643000 | -1.209064000 | 0.008098000  |
| C | -1.210563000 | -0.370634000 | -1.146866000 |
| C | 3.816062000  | -0.550870000 | -1.244484000 |
| C | 3.653403000  | 0.837597000  | -1.224276000 |
| C | 3.779714000  | -1.301985000 | -0.025769000 |
| H | 3.692092000  | 1.403230000  | -2.151565000 |
| H | 3.957407000  | -2.372771000 | -0.041544000 |
| C | 3.443982000  | 1.522662000  | 0.016535000  |
| C | 3.793375000  | -0.590824000 | 1.216786000  |
| H | 3.371960000  | 2.605578000  | 0.033320000  |
| H | 3.938399000  | -1.135767000 | 2.146044000  |
| C | 3.629642000  | 0.797709000  | 1.238436000  |
| H | 3.650530000  | 1.333059000  | 2.184046000  |
| H | 3.978389000  | -1.065634000 | -2.187998000 |

[( $\eta^6$ -corannulene)Dy(Cp)] (**3**)

|    |              |              |              |
|----|--------------|--------------|--------------|
| Gd | -1.766900000 | -0.416976000 | -0.339676000 |
| C  | -0.587451000 | -1.188944000 | 2.094190000  |
| H  | -1.079887000 | -1.836102000 | 2.816439000  |
| C  | -0.795992000 | 0.203951000  | 2.217296000  |
| H  | -1.436162000 | 0.547663000  | 3.025311000  |
| C  | 0.205183000  | 2.574114000  | 1.641427000  |
| H  | -0.359056000 | 3.119696000  | 2.391575000  |
| C  | 1.277423000  | 3.205065000  | 1.017928000  |
| H  | 1.507354000  | 4.225020000  | 1.313950000  |
| C  | 3.519729000  | 2.835044000  | -0.278557000 |
| H  | 3.917879000  | 3.824749000  | -0.076132000 |
| C  | 4.380816000  | 1.861919000  | -0.779615000 |
| H  | 5.418720000  | 2.133696000  | -0.949619000 |
| C  | 4.773356000  | -0.717749000 | -0.998699000 |
| H  | 5.840919000  | -0.638369000 | -1.183224000 |
| C  | 4.251580000  | -1.971803000 | -0.689367000 |

|   |              |              |              |
|---|--------------|--------------|--------------|
| H | 4.929908000  | -2.818464000 | -0.644410000 |
| C | 2.247588000  | -3.201133000 | 0.461197000  |
| H | 2.773277000  | -4.143912000 | 0.586324000  |
| C | 1.049891000  | -3.030238000 | 1.150370000  |
| H | 0.687677000  | -3.838535000 | 1.778234000  |
| C | 0.369105000  | -1.753239000 | 1.155120000  |
| C | -0.071765000 | 1.172681000  | 1.411023000  |
| C | 2.161424000  | 2.522028000  | 0.094939000  |
| C | 3.969805000  | 0.485127000  | -0.954257000 |
| C | 2.871332000  | -2.141491000 | -0.305029000 |
| C | 2.079873000  | -1.009261000 | -0.480716000 |
| C | 0.881869000  | -0.817552000 | 0.243699000  |
| C | 0.665351000  | 0.597533000  | 0.365060000  |
| C | 1.733921000  | 1.253860000  | -0.289125000 |
| C | 2.608247000  | 0.264595000  | -0.796668000 |
| C | -4.002827000 | -0.151308000 | -1.689115000 |
| C | -4.392313000 | -0.471114000 | -0.357823000 |
| C | -4.016250000 | 0.612359000  | 0.484024000  |
| C | -3.398442000 | 1.607245000  | -0.330008000 |
| C | -3.393445000 | 1.135715000  | -1.671926000 |
| H | -4.197959000 | -0.751772000 | -2.571174000 |
| H | -4.930661000 | -1.360638000 | -0.048874000 |
| H | -4.229907000 | 0.698328000  | 1.542668000  |
| H | -3.050595000 | 2.577426000  | 0.004130000  |
| H | -3.037930000 | 1.683231000  | -2.538173000 |

[[ $\eta^6$ -corannulene]Dy(C<sub>6</sub>H<sub>6</sub>)] (**4**)

|    |              |              |              |
|----|--------------|--------------|--------------|
| Gd | -1.545529000 | -0.014354000 | -0.279598000 |
| C  | -0.582913000 | -0.724376000 | 2.140491000  |
| H  | -1.152228000 | -1.226350000 | 2.919674000  |
| C  | -0.588913000 | 0.701560000  | 2.142674000  |
| H  | -1.163437000 | 1.195890000  | 2.922855000  |
| C  | 0.745033000  | 2.849011000  | 1.383395000  |
| H  | 0.267956000  | 3.534764000  | 2.077218000  |
| C  | 1.903862000  | 3.259618000  | 0.724752000  |
| H  | 2.281589000  | 4.255824000  | 0.940619000  |
| C  | 4.066687000  | 2.455557000  | -0.496335000 |
| H  | 4.612303000  | 3.384603000  | -0.359386000 |
| C  | 4.776455000  | 1.322387000  | -0.909403000 |
| H  | 5.845068000  | 1.422986000  | -1.079505000 |
| C  | 4.786485000  | -1.291928000 | -0.915213000 |
| H  | 5.855775000  | -1.383606000 | -1.086087000 |
| C  | 4.085514000  | -2.432243000 | -0.507007000 |
| H  | 4.638126000  | -3.357791000 | -0.374522000 |
| C  | 1.929351000  | -3.257632000 | 0.711537000  |
| H  | 2.314684000  | -4.251857000 | 0.923075000  |
| C  | 0.767751000  | -2.858493000 | 1.372578000  |
| H  | 0.296120000  | -3.550766000 | 2.063653000  |
| C  | 0.283281000  | -1.498289000 | 1.267893000  |
| C  | 0.271027000  | 1.485482000  | 1.273072000  |
| C  | 2.680991000  | 2.377869000  | -0.122745000 |
| C  | 4.164304000  | 0.013031000  | -0.982651000 |
| C  | 2.699394000  | -2.366566000 | -0.132537000 |

|   |              |              |              |
|---|--------------|--------------|--------------|
| C | 2.075440000  | -1.144064000 | -0.414735000 |
| C | 0.918846000  | -0.724907000 | 0.273848000  |
| C | 0.913275000  | 0.720977000  | 0.276652000  |
| C | 2.066477000  | 1.151806000  | -0.410175000 |
| C | 2.783499000  | 0.007472000  | -0.827860000 |
| C | -4.089436000 | -1.349442000 | -0.263489000 |
| H | -4.189549000 | -2.398863000 | 0.004406000  |
| C | -4.211164000 | -0.353354000 | 0.728983000  |
| H | -4.406504000 | -0.635240000 | 1.760473000  |
| C | -4.148296000 | 1.011346000  | 0.370770000  |
| H | -4.294986000 | 1.778540000  | 1.127168000  |
| C | -3.963977000 | 1.378756000  | -0.979304000 |
| H | -3.966639000 | 2.429182000  | -1.262392000 |
| C | -3.836726000 | 0.382459000  | -1.971661000 |
| H | -3.742893000 | 0.665801000  | -3.017954000 |
| C | -3.900613000 | -0.982040000 | -1.613605000 |
| H | -3.855353000 | -1.748412000 | -2.384566000 |

[(exo- $\eta^5$ -corannulene)Dy(endo- $\eta^5$ -corannulene)] (**5**)

|    |              |             |              |
|----|--------------|-------------|--------------|
| Gd | -0.322959666 | 4.836565464 | 7.299124425  |
| C  | 0.739356750  | 3.961052574 | 5.456582428  |
| C  | -1.693817250 | 4.117792574 | 5.211180428  |
| C  | 2.282908750  | 5.767692574 | 5.198348428  |
| C  | 3.080833750  | 5.216154574 | 6.191186428  |
| C  | 3.090110750  | 3.592181574 | 8.253851428  |
| C  | 2.295303750  | 2.755446574 | 9.012514428  |
| C  | -0.100116250 | 1.780827574 | 9.310847428  |
| C  | -1.371354250 | 1.813825574 | 8.797586428  |
| C  | -2.893769250 | 2.833227574 | 6.933810428  |
| C  | -2.896854250 | 3.699425574 | 5.847943428  |
| C  | -1.424046250 | 5.322219574 | 4.433269428  |
| C  | 1.583849750  | 3.414228574 | 6.454232428  |
| C  | -0.156810250 | 5.823082574 | 4.280895428  |
| C  | 0.775347750  | 2.544495574 | 7.220915428  |
| C  | -0.529687250 | 2.562172574 | 6.710862428  |
| C  | -0.551088250 | 3.450761574 | 5.612164428  |
| C  | 0.988421750  | 5.193762574 | 4.872748428  |
| C  | 2.669026750  | 4.044725574 | 6.935414428  |
| C  | 1.036921750  | 2.282868574 | 8.542560428  |
| C  | -1.674412250 | 2.301724574 | 7.483961428  |
| H  | 2.623766750  | 6.712849574 | 4.766889428  |
| H  | 3.810354750  | 5.711124574 | 6.451024428  |
| H  | 3.806192750  | 4.061224574 | 8.728617428  |
| H  | 2.637086750  | 2.482034574 | 9.819295428  |
| H  | 0.174496750  | 1.515664574 | 10.300477428 |
| H  | -2.092983250 | 1.492094574 | 9.370192428  |
| H  | -3.772137250 | 2.623454574 | 7.461505428  |
| H  | -3.858288250 | 3.978729574 | 5.649055428  |
| H  | -2.205449250 | 5.793619574 | 4.109274428  |
| H  | 0.226054750  | 6.653924574 | 3.708289428  |
| C  | -0.025219974 | 7.163068703 | 8.044467849  |
| C  | -1.637766897 | 8.469347657 | 6.762220748  |
| C  | 1.998038078  | 7.998536230 | 8.945457301  |
| C  | 1.865194075  | 7.109754523 | 10.017786852 |
| C  | 0.202648208  | 5.646537512 | 11.397296643 |
| C  | -1.135393331 | 5.284908255 | 11.493326780 |

|   |              |              |              |
|---|--------------|--------------|--------------|
| C | -3.509869823 | 5.654681963  | 10.449240205 |
| C | -4.214360419 | 6.289610457  | 9.458940270  |
| C | -3.973155125 | 7.916627566  | 7.414469769  |
| C | -3.049250844 | 8.664952094  | 6.665683635  |
| C | -0.552904667 | 9.359892083  | 6.475134277  |
| C | -0.136521649 | 6.272288896  | 9.145849967  |
| C | 0.695609565  | 9.197216125  | 7.064954383  |
| C | -1.505246870 | 5.896659823  | 9.233147500  |
| C | -2.220546840 | 6.558030765  | 8.191968624  |
| C | -1.287053631 | 7.328279175  | 7.477682637  |
| C | 0.974656634  | 8.107746818  | 7.947643463  |
| C | 0.722960879  | 6.271814297  | 10.209403074 |
| C | -2.080526197 | 5.529015041  | 10.437259527 |
| C | -3.561749731 | 6.885333043  | 8.308214734  |
| H | 2.780063291  | 8.775291651  | 8.968183356  |
| H | 2.521058860  | 7.252259299  | 10.642577068 |
| H | 0.863136597  | 5.668400333  | 12.290180658 |
| H | -1.478044543 | 4.983721684  | 12.348197167 |
| H | -3.804476975 | 5.179835846  | 11.228696817 |
| H | -5.172218201 | 6.483162732  | 9.321256534  |
| H | -4.777584537 | 8.129780616  | 7.246389015  |
| H | -3.456171981 | 9.461255988  | 6.216399843  |
| H | -0.693351395 | 10.397300225 | 6.039505990  |
| H | 1.256458758  | 9.878637891  | 6.871452779  |

[(endo- $\eta^5$ -corannulene)Dy(endo- $\eta^5$ -corannulene)] (**6**)

|    |              |              |              |
|----|--------------|--------------|--------------|
| Gd | 0.000451000  | -0.197035000 | -0.000083000 |
| C  | -1.951186000 | -1.062842000 | -1.681633000 |
| C  | -0.075095000 | 0.280327000  | -2.605907000 |
| C  | -1.908248000 | -3.264863000 | -0.757117000 |
| C  | -3.010425000 | -2.954631000 | 0.043722000  |
| C  | -4.397163000 | -0.940143000 | 1.104212000  |
| C  | -4.498709000 | 0.456937000  | 1.174288000  |
| C  | -3.424948000 | 2.750570000  | 0.332488000  |
| C  | -2.391923000 | 3.299390000  | -0.434906000 |
| C  | -0.298767000 | 2.694100000  | -1.965855000 |
| C  | 0.435092000  | 1.643061000  | -2.541384000 |
| C  | 0.633115000  | -0.991963000 | -2.670055000 |
| C  | -3.013375000 | -0.742941000 | -0.807991000 |
| C  | 0.071601000  | -2.196800000 | -2.194722000 |
| C  | -3.111106000 | 0.659762000  | -0.731096000 |
| C  | -2.100626000 | 1.215008000  | -1.543084000 |
| C  | -1.396418000 | 0.156442000  | -2.170618000 |
| C  | -1.255648000 | -2.268753000 | -1.599434000 |
| C  | -3.552802000 | -1.607812000 | 0.134646000  |
| C  | -3.763324000 | 1.337337000  | 0.285961000  |
| C  | -1.603717000 | 2.501141000  | -1.355617000 |
| H  | -1.519043000 | -4.278502000 | -0.728507000 |
| H  | -3.428103000 | -3.746636000 | 0.660078000  |
| H  | -4.942221000 | -1.526459000 | 1.838748000  |
| H  | -5.117317000 | 0.879990000  | 1.961150000  |
| H  | -3.946112000 | 3.406710000  | 1.024675000  |
| H  | -2.160947000 | 4.352645000  | -0.303850000 |
| H  | 0.170118000  | 3.673617000  | -1.934767000 |
| H  | 1.426258000  | 1.862611000  | -2.926625000 |
| H  | 1.652201000  | -1.021453000 | -3.046021000 |
| H  | 0.692424000  | -3.087050000 | -2.230772000 |
| C  | 3.012203000  | -0.743542000 | 0.807791000  |

|   |              |              |              |
|---|--------------|--------------|--------------|
| C | 1.254213000  | -2.267894000 | 1.601264000  |
| C | 4.395877000  | -0.942812000 | -1.104190000 |
| C | 4.498310000  | 0.454203000  | -1.175141000 |
| C | 3.426324000  | 2.749174000  | -0.334202000 |
| C | 2.393950000  | 3.299133000  | 0.433337000  |
| C | 0.300691000  | 2.696158000  | 1.965282000  |
| C | -0.433839000 | 1.645849000  | 2.541241000  |
| C | -0.633720000 | -0.989088000 | 2.671040000  |
| C | -0.072956000 | -2.194672000 | 2.196568000  |
| C | 1.906145000  | -3.264953000 | 0.759521000  |
| C | 3.110651000  | 0.659018000  | 0.729866000  |
| C | 3.008271000  | -2.955916000 | -0.041902000 |
| C | 2.100972000  | 1.215360000  | 1.542039000  |
| C | 1.396365000  | 0.157687000  | 2.170551000  |
| C | 1.950349000  | -1.062243000 | 1.682292000  |
| C | 3.551191000  | -1.609417000 | -0.134180000 |
| C | 3.763493000  | 1.335668000  | -0.287400000 |
| C | 1.605217000  | 2.501919000  | 1.354497000  |
| C | 0.075224000  | 0.282702000  | 2.605992000  |
| H | 4.940629000  | -1.529879000 | -1.838353000 |
| H | 5.117255000  | 0.876306000  | -1.962249000 |
| H | 3.947898000  | 3.404723000  | -1.026641000 |
| H | 2.163944000  | 4.352569000  | 0.302006000  |
| H | -0.167356000 | 3.676078000  | 1.934259000  |
| H | -1.424715000 | 1.866313000  | 2.926707000  |
| H | -1.652842000 | -1.017753000 | 3.046976000  |
| H | -0.694375000 | -3.084475000 | 2.233334000  |
| H | 1.516492000  | -4.278446000 | 0.731831000  |
| H | 3.425413000  | -3.748677000 | -0.657650000 |

Table S2: Frequencies of all the models 1-6.

| Complex 1 | Complex 2 | Complex 3 | Complex 4 | Complex 5 | Complex 6 |
|-----------|-----------|-----------|-----------|-----------|-----------|
| 6.9       | -4.7      | 11.6      | 4.8       | 8.8       | 9.7       |
| 27.1      | 10.5      | 19.5      | 10.0      | 19.9      | 25.8      |
| 39.7      | 19.7      | 42.1      | 33.1      | 23.5      | 31.6      |
| 68.0      | 50.7      | 64.2      | 68.4      | 37.8      | 33.2      |
| 76.3      | 55.2      | 72.5      | 73.6      | 48.5      | 46.1      |
| 100.6     | 85.0      | 117.5     | 117.4     | 76.2      | 50.5      |
| 138.8     | 130.2     | 142.2     | 141.6     | 77.9      | 76.5      |
| 139.2     | 132.0     | 169.4     | 162.3     | 91.9      | 108.3     |
| 232.6     | 145.3     | 204.0     | 164.1     | 125.3     | 122.5     |
| 263.5     | 202.5     | 265.8     | 172.6     | 136.8     | 153.4     |
| 270.1     | 210.5     | 267.8     | 194.1     | 137.3     | 156.7     |
| 275.4     | 220.0     | 281.4     | 234.8     | 144.4     | 156.7     |
| 275.8     | 238.8     | 284.1     | 282.5     | 160.1     | 162.1     |
| 300.1     | 242.7     | 298.3     | 284.0     | 202.4     | 168.5     |
| 323.8     | 261.0     | 308.5     | 302.2     | 246.5     | 196.7     |
| 325.2     | 264.6     | 325.7     | 321.7     | 268.8     | 283.8     |
| 411.3     | 301.3     | 408.1     | 397.3     | 272.3     | 284.8     |
| 412.3     | 342.0     | 413.4     | 400.8     | 272.8     | 294.4     |
| 435.4     | 384.6     | 433.3     | 404.2     | 288.6     | 298.4     |



|        |        |        |        |       |       |
|--------|--------|--------|--------|-------|-------|
| 435.8  | 396.9  | 436.6  | 412.3  | 323.0 | 317.1 |
| 443.0  | 401.0  | 436.8  | 420.1  | 325.1 | 321.1 |
| 443.8  | 416.2  | 440.7  | 427.6  | 332.3 | 344.5 |
| 524.0  | 419.2  | 517.6  | 428.4  | 350.9 | 347.6 |
| 542.4  | 422.4  | 542.3  | 433.8  | 412.7 | 404.0 |
| 543.0  | 477.2  | 543.6  | 496.0  | 413.2 | 404.4 |
| 563.8  | 530.6  | 559.9  | 539.4  | 413.9 | 409.8 |
| 575.5  | 534.1  | 588.7  | 540.1  | 426.5 | 409.9 |
| 577.3  | 561.1  | 591.8  | 559.1  | 434.6 | 434.8 |
| 590.2  | 567.2  | 593.8  | 577.9  | 434.7 | 435.6 |
| 593.6  | 573.2  | 606.3  | 596.9  | 436.2 | 437.1 |
| 614.2  | 585.6  | 608.0  | 606.7  | 438.0 | 437.3 |
| 639.7  | 605.6  | 632.0  | 606.9  | 440.0 | 438.0 |
| 645.7  | 606.6  | 642.3  | 607.2  | 441.6 | 438.5 |
| 646.3  | 613.9  | 644.0  | 609.4  | 441.8 | 449.1 |
| 665.7  | 622.5  | 646.6  | 636.2  | 454.8 | 449.6 |
| 666.5  | 627.8  | 663.1  | 638.6  | 520.2 | 530.2 |
| 739.4  | 635.2  | 727.1  | 643.1  | 521.0 | 531.2 |
| 741.9  | 636.8  | 751.7  | 650.1  | 539.0 | 548.2 |
| 754.6  | 649.1  | 760.9  | 658.9  | 539.8 | 548.5 |
| 755.0  | 732.4  | 783.0  | 713.2  | 542.9 | 552.4 |
| 810.4  | 743.9  | 799.0  | 748.2  | 548.5 | 552.6 |
| 811.4  | 748.0  | 820.0  | 758.6  | 564.2 | 561.5 |
| 832.4  | 751.3  | 832.6  | 777.7  | 567.2 | 563.0 |
| 835.4  | 755.9  | 837.0  | 778.4  | 572.0 | 589.5 |
| 838.1  | 766.7  | 838.0  | 807.5  | 573.2 | 591.5 |
| 852.0  | 805.5  | 851.2  | 825.6  | 606.1 | 604.8 |
| 852.5  | 816.4  | 852.0  | 849.7  | 608.4 | 605.3 |
| 857.6  | 846.1  | 855.3  | 852.7  | 615.1 | 613.5 |
| 858.0  | 858.3  | 856.9  | 868.9  | 620.6 | 615.1 |
| 873.2  | 869.4  | 864.2  | 874.8  | 637.3 | 628.2 |
| 873.7  | 871.3  | 870.2  | 897.7  | 638.5 | 628.3 |
| 901.7  | 903.0  | 888.5  | 929.1  | 639.0 | 643.4 |
| 911.7  | 905.3  | 910.8  | 936.3  | 647.5 | 643.4 |
| 915.6  | 923.9  | 916.1  | 938.3  | 647.7 | 649.0 |
| 931.8  | 932.2  | 932.3  | 974.6  | 662.6 | 650.4 |
| 995.9  | 939.7  | 983.2  | 986.6  | 663.0 | 661.4 |
| 1005.1 | 957.5  | 993.4  | 999.4  | 664.0 | 662.0 |
| 1005.2 | 959.7  | 999.3  | 1006.8 | 668.0 | 676.6 |
| 1014.3 | 989.3  | 1005.1 | 1012.6 | 682.4 | 677.3 |
| 1014.6 | 990.4  | 1011.5 | 1012.7 | 730.4 | 753.9 |
| 1035.9 | 1001.1 | 1034.7 | 1020.6 | 731.1 | 754.0 |
| 1037.4 | 1004.1 | 1038.1 | 1030.5 | 753.8 | 756.3 |

|        |        |        |        |        |        |
|--------|--------|--------|--------|--------|--------|
| 1054.9 | 1013.5 | 1050.4 | 1031.9 | 753.9  | 756.6  |
| 1086.9 | 1014.8 | 1084.1 | 1040.5 | 757.1  | 780.8  |
| 1088.2 | 1022.0 | 1087.1 | 1045.5 | 762.0  | 781.3  |
| 1090.0 | 1027.2 | 1089.6 | 1046.4 | 790.0  | 783.4  |
| 1090.5 | 1039.2 | 1093.8 | 1048.7 | 798.5  | 784.4  |
| 1135.3 | 1058.6 | 1135.1 | 1082.6 | 815.5  | 811.3  |
| 1164.2 | 1076.2 | 1154.2 | 1092.7 | 815.6  | 812.4  |
| 1164.8 | 1081.7 | 1168.9 | 1138.7 | 816.8  | 819.9  |
| 1172.0 | 1110.6 | 1172.9 | 1160.3 | 827.7  | 823.8  |
| 1172.4 | 1125.5 | 1174.1 | 1168.8 | 854.2  | 857.3  |
| 1212.5 | 1138.7 | 1202.6 | 1172.6 | 854.9  | 859.3  |
| 1213.5 | 1174.5 | 1213.6 | 1192.2 | 855.4  | 861.2  |
| 1231.7 | 1182.5 | 1219.8 | 1201.9 | 859.3  | 861.4  |
| 1231.9 | 1187.8 | 1223.2 | 1202.2 | 874.5  | 866.3  |
| 1251.8 | 1193.8 | 1244.0 | 1207.8 | 878.1  | 871.8  |
| 1270.5 | 1212.0 | 1265.0 | 1212.2 | 878.4  | 872.5  |
| 1294.2 | 1221.6 | 1294.1 | 1221.8 | 880.1  | 875.6  |
| 1340.0 | 1230.6 | 1331.3 | 1226.2 | 905.1  | 894.6  |
| 1340.1 | 1235.4 | 1332.8 | 1244.9 | 907.5  | 899.7  |
| 1380.1 | 1257.7 | 1373.6 | 1262.4 | 929.3  | 938.7  |
| 1380.4 | 1270.7 | 1392.3 | 1323.5 | 934.1  | 939.0  |
| 1393.2 | 1325.4 | 1397.0 | 1326.0 | 993.8  | 976.3  |
| 1397.2 | 1332.2 | 1397.4 | 1336.2 | 1000.3 | 977.6  |
| 1429.0 | 1361.5 | 1431.7 | 1361.0 | 1001.5 | 989.8  |
| 1440.4 | 1364.2 | 1434.6 | 1379.9 | 1002.7 | 990.2  |
| 1440.7 | 1367.8 | 1439.0 | 1400.0 | 1009.3 | 1000.0 |
| 1446.8 | 1377.9 | 1448.1 | 1415.2 | 1009.7 | 1002.3 |
| 1447.4 | 1399.4 | 1452.0 | 1430.1 | 1009.8 | 1006.5 |
| 1455.4 | 1424.0 | 1463.9 | 1437.4 | 1016.1 | 1008.9 |
| 1457.2 | 1439.1 | 1469.5 | 1440.2 | 1019.0 | 1016.5 |
| 1470.5 | 1446.6 | 1472.6 | 1450.1 | 1019.1 | 1017.3 |
| 1472.2 | 1450.3 | 1473.0 | 1451.7 | 1052.8 | 1046.8 |
| 1482.0 | 1452.2 | 1475.0 | 1465.7 | 1056.1 | 1047.4 |
| 1482.3 | 1463.8 | 1485.3 | 1473.2 | 1087.3 | 1092.8 |
| 1523.9 | 1465.9 | 1511.9 | 1474.1 | 1087.9 | 1093.1 |
| 1623.6 | 1475.0 | 1609.9 | 1498.6 | 1089.9 | 1093.4 |
| 1625.4 | 1479.7 | 1624.9 | 1499.1 | 1091.1 | 1093.4 |
| 1626.0 | 1492.0 | 1641.2 | 1507.7 | 1156.5 | 1147.2 |
| 1635.6 | 1499.8 | 1649.0 | 1581.1 | 1165.0 | 1147.8 |
| 1636.5 | 1513.2 | 1653.1 | 1596.7 | 1165.5 | 1155.7 |
| 3204.2 | 1577.5 | 3194.2 | 1597.3 | 1165.8 | 1156.6 |
| 3204.8 | 1579.9 | 3203.5 | 1601.6 | 1170.1 | 1168.1 |
| 3205.0 | 1582.4 | 3204.3 | 1620.5 | 1172.4 | 1168.6 |

|        |        |        |        |        |        |
|--------|--------|--------|--------|--------|--------|
| 3205.2 | 1592.9 | 3205.7 | 1620.6 | 1172.9 | 1171.2 |
| 3205.4 | 1623.6 | 3206.2 | 1642.4 | 1173.2 | 1171.4 |
| 3215.6 | 3203.5 | 3208.7 | 3193.5 | 1195.0 | 1189.6 |
| 3216.2 | 3203.9 | 3216.6 | 3196.4 | 1214.1 | 1190.0 |
| 3216.3 | 3205.4 | 3217.3 | 3201.3 | 1214.4 | 1206.2 |
| 3216.4 | 3206.0 | 3218.2 | 3202.1 | 1215.9 | 1206.3 |
| 3216.6 | 3206.7 | 3218.3 | 3204.0 | 1220.5 | 1214.6 |
| 3227.2 | 3207.0 | 3226.9 | 3206.1 | 1221.5 | 1215.1 |
| 3232.2 | 3208.6 | 3232.4 | 3206.2 | 1232.2 | 1218.0 |
| 3241.8 | 3211.1 | 3241.7 | 3208.9 | 1232.5 | 1218.6 |
| 3243.6 | 3214.6 | 3245.2 | 3209.2 | 1245.0 | 1242.3 |
| 3255.4 | 3214.7 | 3256.4 | 3209.4 | 1252.7 | 1242.4 |
|        | 3215.0 |        | 3210.3 | 1266.5 | 1259.1 |
|        | 3216.3 |        | 3217.3 | 1272.1 | 1259.7 |
|        | 3216.6 |        | 3218.3 | 1333.0 | 1329.0 |
|        | 3218.5 |        | 3218.4 | 1336.1 | 1329.6 |
|        | 3222.6 |        | 3220.0 | 1339.4 | 1331.5 |
|        | 3224.7 |        | 3220.1 | 1339.8 | 1331.8 |
|        |        |        |        | 1376.1 | 1379.0 |
|        |        |        |        | 1377.3 | 1379.5 |
|        |        |        |        | 1378.1 | 1393.2 |
|        |        |        |        | 1398.4 | 1393.5 |
|        |        |        |        | 1422.6 | 1427.4 |
|        |        |        |        | 1432.9 | 1427.8 |
|        |        |        |        | 1435.6 | 1429.1 |
|        |        |        |        | 1438.2 | 1430.4 |
|        |        |        |        | 1441.4 | 1436.8 |
|        |        |        |        | 1441.8 | 1438.2 |
|        |        |        |        | 1442.0 | 1442.4 |
|        |        |        |        | 1443.4 | 1443.1 |
|        |        |        |        | 1444.5 | 1449.9 |
|        |        |        |        | 1450.7 | 1450.9 |
|        |        |        |        | 1450.9 | 1461.7 |
|        |        |        |        | 1452.1 | 1463.2 |
|        |        |        |        | 1453.0 | 1464.0 |
|        |        |        |        | 1469.4 | 1464.0 |
|        |        |        |        | 1473.1 | 1468.0 |
|        |        |        |        | 1481.8 | 1468.4 |
|        |        |        |        | 1482.1 | 1493.5 |
|        |        |        |        | 1483.3 | 1494.3 |
|        |        |        |        | 1509.6 | 1500.2 |
|        |        |        |        | 1523.9 | 1500.3 |
|        |        |        |        | 1604.2 | 1630.4 |

|        |        |
|--------|--------|
| 1614.1 | 1630.8 |
| 1615.2 | 1640.9 |
| 1615.7 | 1642.5 |
| 1617.0 | 1656.9 |
| 1627.6 | 1658.0 |
| 1628.1 | 1665.8 |
| 1631.5 | 1666.2 |
| 1643.3 | 1674.1 |
| 1651.6 | 1674.3 |
| 3203.6 | 3203.3 |
| 3203.7 | 3203.5 |
| 3204.0 | 3204.3 |
| 3204.2 | 3204.4 |
| 3204.3 | 3205.9 |
| 3204.4 | 3205.9 |
| 3205.0 | 3207.8 |
| 3208.6 | 3207.8 |
| 3209.0 | 3209.7 |
| 3209.1 | 3209.9 |
| 3213.5 | 3215.3 |
| 3213.9 | 3215.5 |
| 3214.6 | 3215.7 |
| 3214.7 | 3216.1 |
| 3214.9 | 3216.3 |
| 3214.9 | 3216.4 |
| 3215.5 | 3220.0 |
| 3219.3 | 3220.1 |
| 3219.4 | 3220.3 |
| 3219.6 | 3220.5 |

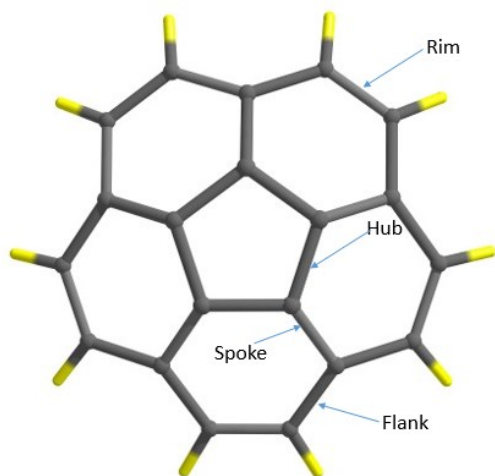

**Figure S1:** Four types of bonds in corannulene ligand.

**Table S3.** Bond critical point (BCP) properties for Models 1-6. <sup>a</sup>The electron density at the bond critical density (BCP), <sup>b</sup> The Laplacian of the electron density at the BCP, <sup>c</sup>The Virial Field function, <sup>d</sup>The electronic kinetic energy density, <sup>e</sup>Ratio of Virial field function to Electronic kinetic energy <sup>f</sup>The total energy density at the BCP.

| Model    | Gd-C pairs | $\rho(r)^a$ | $\nabla^2\rho(r)^b$ | $ V(r)^c $ | $G(r)^d$ | $V(r)/G(r)^e$ | $H(r)^f$ |
|----------|------------|-------------|---------------------|------------|----------|---------------|----------|
| <b>1</b> | Gd-C31     | 0.0305      | 0.0234              | 0.0245     | 0.0247   | 0.9839        | -0.0004  |
|          | Gd-C30     | 0.0284      | 0.0233              | 0.0232     | 0.0233   | 0.9968        | 7.5E-05  |
|          | Gd-C27     | 0.0317      | 0.0244              | 0.0259     | 0.0252   | 1.0272        | 0.0007   |
|          | Gd-C28     | 0.0319      | 0.0241              | 0.0258     | 0.0250   | 1.0333        | 0.0008   |
|          | Gd-C32     | 0.0445      | 0.0283              | 0.0376     | 0.0329   | 1.1415        | 0.0046   |
|          | Gd-C33     | 0.0433      | 0.0277              | 0.0361     | 0.0319   | 1.1322        | 0.0042   |
|          | Gd-C35     | 0.0418      | 0.0279              | 0.0351     | 0.0315   | 1.1322        | 0.0036   |
|          | Gd-C36     | 0.0445      | 0.0277              | 0.0372     | 0.0325   | 1.1465        | 0.0048   |
|          | Gd-C34     | 0.0412      | 0.0274              | 0.0346     | 0.0310   | 1.1165        | 0.0036   |
| <b>2</b> | Gd-C29     | 0.0251      | 0.0161              | 0.0172     | 0.0167   | 1.0312        | 0.0005   |
|          | Gd-C31     | 0.0249      | 0.0161              | 0.0169     | 0.0166   | 1.0227        | 0.0004   |
|          | Gd-C30     | 0.0265      | 0.0165              | 0.0184     | 0.0175   | 1.0543        | 0.0009   |
|          | Gd-C34     | 0.0392      | 0.0263              | 0.0324     | 0.0294   | 1.1038        | 0.0030   |
|          | Gd-C37     | 0.0406      | 0.0271              | 0.0341     | 0.0306   | 1.1147        | 0.0035   |
| <b>3</b> | Gd-C28     | 0.0288      | 0.0248              | 0.0232     | 0.0240   | 0.9685        | -0.0008  |
|          | Gd-C34     | 0.0427      | 0.0287              | 0.0362     | 0.0324   | 1.1161        | 0.0038   |
|          | Gd-C35     | 0.0429      | 0.0293              | 0.0369     | 0.0331   | 1.1136        | 0.0038   |
|          | Gd-C29     | 0.0301      | 0.0234              | 0.0241     | 0.0237   | 1.0158        | 0.0004   |
|          | Gd-C2      | 0.0274      | 0.0205              | 0.0207     | 0.0206   | 1.0036        | 7.6E-05  |
|          | Gd-C4      | 0.0285      | 0.0189              | 0.0203     | 0.0196   | 1.0371        | 0.0007   |
|          | Gd-C33     | 0.0408      | 0.0285              | 0.0346     | 0.0315   | 1.0979        | 0.0031   |
|          | Gd-C32     | 0.0416      | 0.0274              | 0.0347     | 0.0311   | 1.1173        | 0.0036   |
|          | Gd-C36     | 0.0418      | 0.0292              | 0.0360     | 0.0326   | 1.1039        | 0.0034   |

|   |        |        |        |        |        |        |          |
|---|--------|--------|--------|--------|--------|--------|----------|
| 4 | Gd-C28 | 0.0393 | 0.0267 | 0.0328 | 0.0297 | 1.1028 | 0.0031   |
|   | Gd-C2  | 0.0366 | 0.0229 | 0.0260 | 0.0244 | 1.0627 | 0.0015   |
|   | Gd-C29 | 0.0392 | 0.0267 | 0.0326 | 0.0297 | 1.0993 | 0.0029   |
|   | Gd-C42 | 0.0249 | 0.0170 | 0.0169 | 0.0170 | 0.9968 | -5.3E-05 |
|   | Gd-C34 | 0.0248 | 0.0173 | 0.0169 | 0.0171 | 0.9882 | -0.0002  |
|   | Gd-C36 | 0.0250 | 0.0170 | 0.0169 | 0.0170 | 0.9950 | -8.4E-05 |
|   | Gd-C38 | 0.0249 | 0.0169 | 0.0168 | 0.0169 | 0.9976 | -4E-05   |
|   | Gd-C40 | 0.0246 | 0.0171 | 0.0169 | 0.0170 | 0.9952 | -8E-05   |
|   | Gd-C32 | 0.0252 | 0.0169 | 0.0169 | 0.0169 | 0.9995 | -8E-06   |
| 5 | Gd-C27 | 0.0485 | 0.0343 | 0.0464 | 0.0404 | 1.1496 | 0.0060   |
|   | Gd-C46 | 0.0325 | 0.0239 | 0.0262 | 0.0250 | 1.0458 | 0.0011   |
|   | Gd-C45 | 0.0318 | 0.0237 | 0.0255 | 0.0246 | 1.0381 | 0.0009   |
|   | Gd-C32 | 0.0312 | 0.0232 | 0.0249 | 0.0241 | 1.0354 | 0.0008   |
|   | Gd-C43 | 0.0308 | 0.0235 | 0.0247 | 0.0241 | 1.0268 | 0.0006   |
|   | Gd-C47 | 0.0318 | 0.0238 | 0.0255 | 0.0247 | 1.0348 | 0.0009   |
| 6 | Gd-C17 | 0.0418 | 0.0293 | 0.0365 | 0.0329 | 1.1095 | 0.0036   |
|   | Gd-C46 | 0.0419 | 0.0293 | 0.0366 | 0.0330 | 1.1098 | 0.0036   |

**Table S4.**Energy Decomposition Analysis of model 1-6.

| Model | Total interaction energy(kJ/mol) | Orbital energy(kJ/mol) | Steric energy(kJ/mol) |
|-------|----------------------------------|------------------------|-----------------------|
| 1     | -2513.9                          | -1495.1                | -1018.8               |
| 2     | -1192.3                          | -1496.8                | 304.4                 |
| 3     | -2488.8                          | -1682.9                | -805.8                |
| 4     | -1256.4                          | -1580.9                | 324.4                 |
| 5     | -1383.9                          | -1935.8                | 551.8                 |
| 6     | -1310.0                          | -1907.8                | 597.8                 |

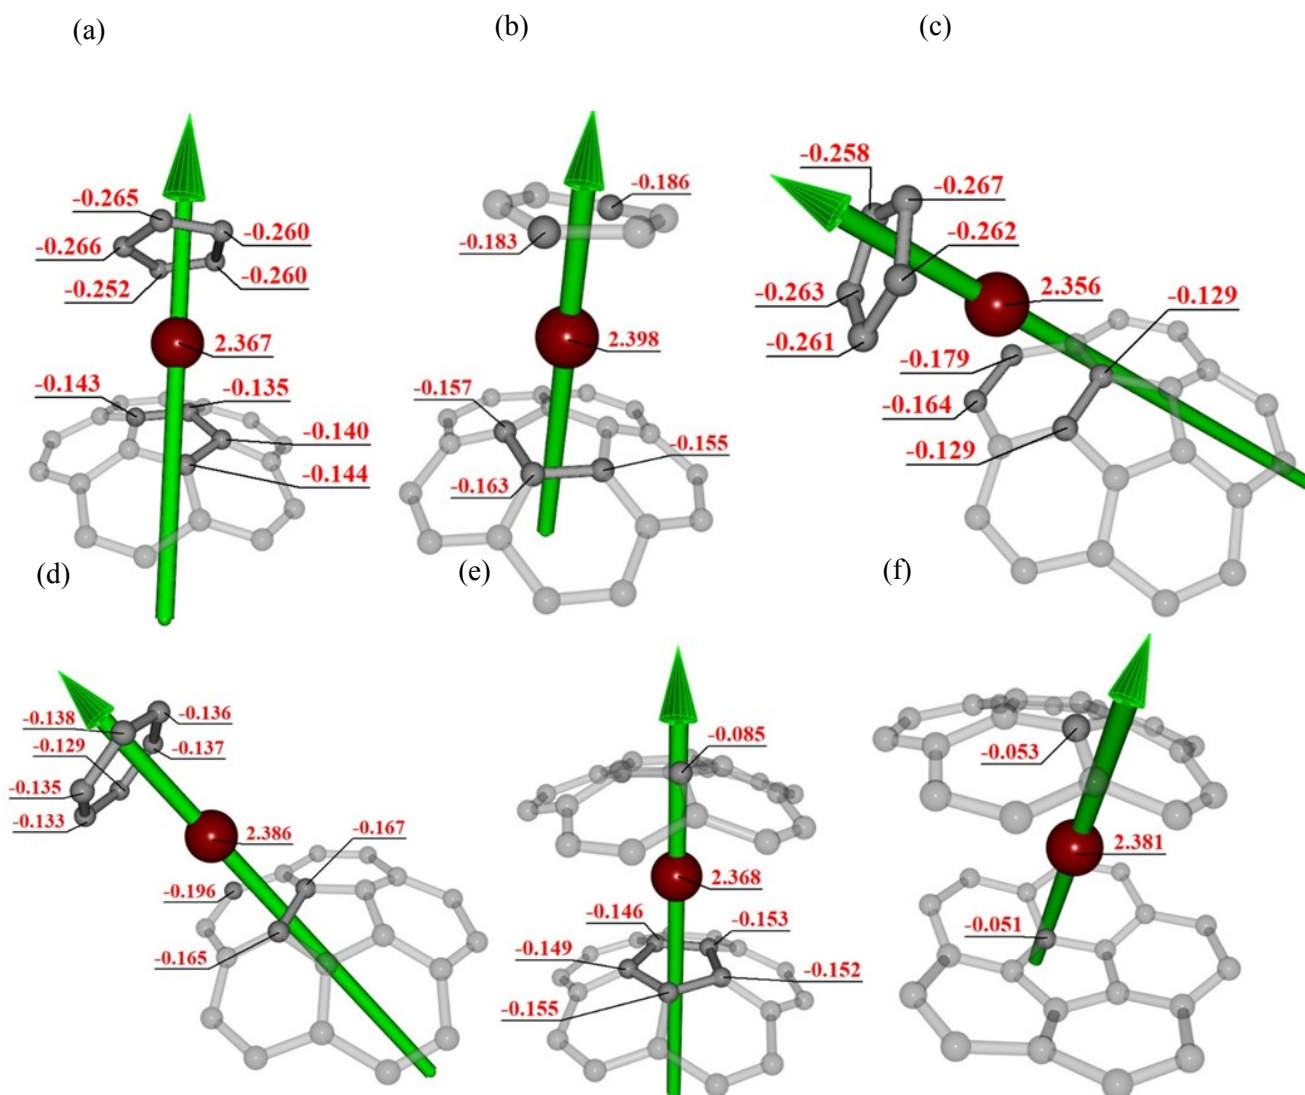

**Fig. S2.** *Ab initio* SINGLE\_ANISO computed ground state KD orientation for (a-f) Models 1-6 respectively along with the computed LoProp charges on the important atoms.

**Table S5:** Thermally accessible structures at different time steps (in fs) for models **3,5** and **6**, along with their relative energies ( $\Delta E$ ),  $U_{\text{cal}}$  and magnetic relaxation mode. It is important to mention here that for model **6**, 128 structures are possible, and we have selected some representing structures from each potential well. See the text in the main manuscript for more information.

|            | t (fs)     | $\Delta E$ (kJ/mol) | $U_{\text{cal}}$ cm <sup>-1</sup> | Relaxation Via              |
|------------|------------|---------------------|-----------------------------------|-----------------------------|
| <b>5-1</b> | <i>f1</i>  | 0.0                 | <b>651.8</b>                      | 7 <sup>th</sup> KD (Orbach) |
| <b>5-2</b> | <i>f2</i>  | 8.5                 | 647.3                             | 7 <sup>th</sup> KD (Orbach) |
| <b>5-3</b> | <i>f3</i>  | 32.7                | 643.4                             | 7 <sup>th</sup> KD (Orbach) |
| <b>5-4</b> | <i>f4</i>  | 63.9                | 640.7                             | 7 <sup>th</sup> KD (Orbach) |
| <b>5-5</b> | <i>f60</i> | 80.5                | <b>506.0</b>                      | 6 <sup>th</sup> KD (Orbach) |
| <b>5-6</b> | <i>f61</i> | 81.4                | 510.2                             | 6 <sup>th</sup> KD (Orbach) |
|            |            |                     |                                   |                             |
| <b>6-1</b> | <i>f1</i>  | 0.0                 | 593.9                             | 6 <sup>th</sup> KD (TA-QTM) |

|      |                          |      |       |                             |
|------|--------------------------|------|-------|-----------------------------|
| 6-2  | <i>f</i> <sub>2</sub>    | 8.5  | 598.3 | 6 <sup>th</sup> KD (TA-QTM) |
| 6-3  | <i>f</i> <sub>3</sub>    | 33.6 | 602.2 | 6 <sup>th</sup> KD (TA-QTM) |
| 6-4  | <i>f</i> <sub>21</sub>   | 75.4 | 595.3 | 6 <sup>th</sup> KD (TA-QTM) |
| 6-5  | <i>f</i> <sub>23</sub>   | 68.7 | 594.4 | 6 <sup>th</sup> KD (TA-QTM) |
| 6-6  | <i>f</i> <sub>25</sub>   | 81.4 | 583.5 | 6 <sup>th</sup> KD (TA-QTM) |
| 6-7  | <i>f</i> <sub>44</sub>   | 71.6 | 512.5 | 5 <sup>th</sup> KD (TA-QTM) |
| 6-8  | <i>f</i> <sub>60</sub>   | 58.8 | 491.0 | 5 <sup>th</sup> KD (TA-QTM) |
| 6-9  | <i>f</i> <sub>72</sub>   | 81.4 | 471.3 | 5 <sup>th</sup> KD (TA-QTM) |
| 6-10 | <i>f</i> <sub>85</sub>   | 82.0 | 424.1 | 5 <sup>th</sup> KD (TA-QTM) |
| 6-11 | <i>f</i> <sub>129</sub>  | 71.9 | 438.8 | 5 <sup>th</sup> KD (TA-QTM) |
| 6-12 | <i>f</i> <sub>156</sub>  | 73.9 | 500.0 | 5 <sup>th</sup> KD (TA-QTM) |
| 6-13 | <i>f</i> <sub>438</sub>  | 81.0 | 664.3 | 6 <sup>th</sup> KD (TA-QTM) |
| 6-14 | <i>f</i> <sub>481</sub>  | 73.8 | 517.5 | 6 <sup>th</sup> KD (Orbach) |
| 6-15 | <i>f</i> <sub>1008</sub> | 72.5 | 497.1 | 5 <sup>th</sup> KD (Orbach) |
| 6-16 | <i>f</i> <sub>1030</sub> | 73.9 | 483.2 | 5 <sup>th</sup> KD (Orbach) |
| 6-17 | <i>f</i> <sub>1053</sub> | 67.4 | 751.4 | 7 <sup>th</sup> KD (TA-QTM) |
| 6-18 | <i>f</i> <sub>1072</sub> | 82.1 | 720.1 | 7 <sup>th</sup> KD (Orbach) |
| 6-19 | <i>f</i> <sub>1182</sub> | 83.0 | 68.9  | 2 <sup>nd</sup> KD (Orbach) |
| 6-20 | <i>f</i> <sub>1289</sub> | 79.8 | 98.8  | 2 <sup>nd</sup> KD (Orbach) |
| 6-21 | <i>f</i> <sub>1486</sub> | 81.0 | 106.7 | 2 <sup>nd</sup> KD (Orbach) |
| 6-22 | <i>f</i> <sub>1510</sub> | 75.8 | 104.7 | 2 <sup>nd</sup> KD (Orbach) |
| 6-23 | <i>f</i> <sub>1572</sub> | 81.6 | 168.3 | 2 <sup>nd</sup> KD (Orbach) |
| 6-24 | <i>f</i> <sub>1803</sub> | 77.2 | 563.6 | 5 <sup>th</sup> KD (Orbach) |
| 6-25 | <i>f</i> <sub>1818</sub> | 77.6 | 506.8 | 5 <sup>th</sup> KD (TA-QTM) |
| 6-26 | <i>f</i> <sub>1829</sub> | 78.9 | 470.8 | 5 <sup>th</sup> KD (TA-QTM) |
|      |                          |      |       |                             |
| 3-1  | <i>f</i> <sub>1</sub>    | 7.2  | 891.9 | 6 <sup>th</sup> KD (TA-QTM) |
| 3-2  | <i>f</i> <sub>2</sub>    | 24.5 | 892.2 | 6 <sup>th</sup> KD (TA-QTM) |
| 3-3  | <i>f</i> <sub>3</sub>    | 42.7 | 892.6 | 6 <sup>th</sup> KD (TA-QTM) |
| 3-4  | <i>f</i> <sub>14</sub>   | 67.8 | 882.1 | 6 <sup>th</sup> KD (TA-QTM) |
| 3-5  | <i>f</i> <sub>22</sub>   | 53.1 | 897.5 | 6 <sup>th</sup> KD (TA-QTM) |
| 3-6  | <i>f</i> <sub>28</sub>   | 62.9 | 924.5 | 6 <sup>th</sup> KD (TA-QTM) |
| 3-7  | <i>f</i> <sub>33</sub>   | 62.5 | 936.7 | 6 <sup>th</sup> KD (TA-QTM) |
| 3-8  | <i>f</i> <sub>64</sub>   | 48.6 | 881.2 | 6 <sup>th</sup> KD (Orbach) |
| 3-9  | <i>f</i> <sub>127</sub>  | 71.9 | 878.8 | 6 <sup>th</sup> KD (TA-QTM) |
| 3-10 | <i>f</i> <sub>248</sub>  | 78.0 | 784.2 | 6 <sup>th</sup> KD (Orbach) |

**Table S6:** CASSCF+RASSI-SO computed relative energies of eight low lying KDs and g tensors of eight low lying KDs for thermally accessible structures of Models 3,5 and 6, along with the matrix element of the transverse moment for QTM (quantum tunnelling of the magnetisation), TA-QTM (thermally assisted QTM) and Orbach process. We have also given the  $U_{cal}$  values for all the possible structures.

|     | KD (l) | $E_{KD}$ (cm <sup>-1</sup> ) | $g_{xx}, g_{yy}, g_{zz}$ | QTM/TA-QTM | Orbach<br>[ $l \rightarrow (l+1)$ ] | $U_{cal}$ (cm <sup>-1</sup> ) |
|-----|--------|------------------------------|--------------------------|------------|-------------------------------------|-------------------------------|
| 5-1 | 1      | 0.0                          | 0.001,0.001,19.879       | 2.1E-04    | 4.0E-04                             | 651.8                         |
|     | 2      | 164.9                        | 0.001,0.005,17.395       | 4.8E-04    | 1.9E-03                             |                               |



|             |   |       |                    |         |         |       |
|-------------|---|-------|--------------------|---------|---------|-------|
|             | 3 | 291.1 | 0.027,0.030,14.542 | 9.8E-03 | 2.5E-02 |       |
|             | 4 | 411.2 | 0.187,0.247,12.055 | 7.5E-02 | 7.5E-02 |       |
|             | 5 | 501.1 | 0.123,0.234,9.750  | 7.1E-02 | 1.2E-01 |       |
|             | 6 | 580.3 | 0.461,0.862,6.875  | 2.5E-01 | 2.3     |       |
|             | 7 | 651.8 | 3.987,3.046,1.361  | 1.3     | 2.4     |       |
|             | 8 | 695.2 | 12.671,8.446,1.231 | 3.6     |         |       |
| <b>5-2</b>  | 1 | 0.0   | 0.001,0.001,19.877 | 2.2E-04 | 4.1E-04 | 647.3 |
|             | 2 | 163.1 | 0.001,0.001,17.406 | 4.7E-04 | 1.9E-03 |       |
|             | 3 | 287.9 | 0.027,0.033,14.548 | 1.1E-02 | 2.5E-02 |       |
|             | 4 | 407.5 | 0.181,0.245,12.044 | 7.4E-02 | 6.8E-02 |       |
|             | 5 | 497.4 | 0.110,0.248,9.718  | 7.1E-02 | 1.2E-01 |       |
|             | 6 | 576.3 | 0.449,0.707,6.865  | 2.2E-01 | 9.0E-01 |       |
|             | 7 | 647.3 | 0.705,2.399,4.101  | 5.9E-01 | 5.3E-01 |       |
|             | 8 | 690.1 | 12.113,8.985,1.244 | 3.6     |         |       |
| <b>5-3</b>  | 1 | 0.0   | 0.001,0.001,19.875 | 2.2E-04 | 4.3E-04 | 643.4 |
|             | 2 | 163.1 | 0.001,0.001,17.406 | 4.9E-04 | 2.0E-03 |       |
|             | 3 | 285.3 | 0.029,0.034,14.551 | 1.1E-02 | 2.5E-02 |       |
|             | 4 | 404.4 | 0.177,0.241,12.031 | 7.3E-02 | 6.2E-02 |       |
|             | 5 | 494.4 | 0.037,0.319,9.678  | 8.2E-02 | 1.4E-01 |       |
|             | 6 | 573.1 | 0.404,0.589,6.855  | 1.9E-01 | 1.9     |       |
|             | 7 | 643.4 | 4.229,2.727,1.041  | 1.4     | 2.0     |       |
|             | 8 | 686.5 | 12.592,8.415,1.208 | 3.6     |         |       |
| <b>5-4</b>  | 1 | 0.0   | 0.001,0.001,19.873 | 2.2E-04 | 4.4E-04 | 640.7 |
|             | 2 | 161.0 | 0.001,0.001,17.417 | 4.8E-04 | 2.0E-03 |       |
|             | 3 | 283.4 | 0.030,0.036,14.553 | 1.2E-02 | 2.5E-02 |       |
|             | 4 | 402.0 | 0.178,0.241,12.018 | 7.2E-02 | 5.7E-02 |       |
|             | 5 | 492.2 | 0.029,0.389,9.637  | 9.7E-02 | 1.6E-01 |       |
|             | 6 | 570.9 | 0.359,0.566,6.845  | 1.8E-01 | 1.7     |       |
|             | 7 | 640.7 | 4.370,3.260,1.521  | 1.6     | 1.8     |       |
|             | 8 | 684.4 | 13.188,7.720,1.179 | 3.6     |         |       |
| <b>5-60</b> | 1 | 0.0   | 0.002,0.002,19.768 | 5.9E-04 | 1.4E-03 | 506.0 |
|             | 2 | 143.3 | 0.009,0.010,17.475 | 3.7E-03 | 6.1E-03 |       |
|             | 3 | 248.6 | 0.012,0.037,14.503 | 8.8E-03 | 4.2E-02 |       |
|             | 4 | 361.0 | 0.280,0.331,12.128 | 1.1E-01 | 1.7E-01 |       |
|             | 5 | 437.6 | 0.493,0.940,10.260 | 3.0E-01 | 3.2     |       |
|             | 6 | 506.0 | 2.870,3.449,7.283  | 1.3     | 2.1     |       |
|             | 7 | 577.9 | 2.627,4.915,10.645 | 1.3     | 7.7E-01 |       |
|             | 8 | 652.6 | 0.512,1.920,17.760 | 4.4E-01 |         |       |
| <b>5-61</b> | 1 | 0.0   | 0.002,0.002,19.761 | 5.7E-04 | 1.4E-03 | 510.2 |
|             | 2 | 148.2 | 0.009,0.010,17.476 | 3.6E-03 | 6.0E-03 |       |
|             | 3 | 252.0 | 0.015,0.041,14.506 | 1.0E-02 | 4.2E-02 |       |
|             | 4 | 364.7 | 0.263,0.310,12.109 | 1.0E-01 | 1.7E-01 |       |
|             | 5 | 441.6 | 0.617,1.010,10.213 | 3.3E-01 | 3.2     |       |
|             | 6 | 510.2 | 3.120,3.592,7.386  | 1.4     | 2.1     |       |
|             | 7 | 583.9 | 2.509,4.830,11.183 | 1.6     | 6.9E-01 |       |
|             | 8 | 664.7 | 0.454,1.629,18.015 | 3.9E-01 |         |       |
| <b>6-1</b>  | 1 | 0.0   | 0.000,0.000,19.982 | 2.5E-05 | 1.3E-04 | 593.9 |
|             | 2 | 135.1 | 0.004,0.004,17.312 | 1.5E-03 | 1.5E-03 |       |
|             | 3 | 294.7 | 0.023,0.283,14.661 | 9.2E-03 | 8.6E-03 |       |
|             | 4 | 436.5 | 0.005,0.077,11.856 | 1.4E-02 | 3.4E-02 |       |

|             |   |       |                    |         |         |       |
|-------------|---|-------|--------------------|---------|---------|-------|
|             | 5 | 539.3 | 0.150,0.650,9.929  | 1.4E-01 | 2.1E-01 |       |
|             | 6 | 593.9 | 8.793,7.664,4.612  | 2.8     | 1.6     |       |
|             | 7 | 631.6 | 0.699,1.224,18.849 | 3.6E-01 | 3.9E-01 |       |
|             | 8 | 706.2 | 0.007,0.055,19.460 | 1.3E-02 |         |       |
| <b>6-2</b>  | 1 | 0.0   | 0.000,0.000,19.842 | 2.7E-05 | 1.3E-04 | 598.3 |
|             | 2 | 136.8 | 0.004,0.004,17.306 | 1.4E-03 | 1.5E-03 |       |
|             | 3 | 298.1 | 0.021,0.026,14.660 | 8.6E-03 | 8.3E-03 |       |
|             | 4 | 440.5 | 0.003,0.064,11.856 | 1.3E-02 | 4.0E-02 |       |
|             | 5 | 543.6 | 0.198,0.675,8.937  | 1.5E-01 | 2.5E-01 |       |
|             | 6 | 598.3 | 8.669,7.724,4.252  | 2.8     | 1.6     |       |
|             | 7 | 635.3 | 0.692,1.249,18.731 | 3.9E-01 | 3.1E-01 |       |
|             | 8 | 711.8 | 0.015,0.073,19.465 | 2.0E-02 |         |       |
| <b>6-3</b>  | 1 | 0.0   | 0.000,0.000,19.844 | 3.1E-05 | 1.4E-04 | 602.2 |
|             | 2 | 138.6 | 0.004,0.004,17.309 | 1.4E-03 | 1.4E-03 |       |
|             | 3 | 301.3 | 0.020,0.025,14.658 | 8.1E-03 | 8.0E-03 |       |
|             | 4 | 444.2 | 0.009,0.052,11.857 | 1.2E-02 | 4.9E-02 |       |
|             | 5 | 547.7 | 0.310,0.767,8.952  | 1.9E-01 | 3.0E-01 |       |
|             | 6 | 602.2 | 8.583,7.771,4.224  | 2.9     | 1.6     |       |
|             | 7 | 638.8 | 0.677,1.257,18.587 | 4.1E-01 | 2.5E-01 |       |
|             | 8 | 717.5 | 0.023,0.093,19.461 | 2.7E-02 |         |       |
| <b>6-21</b> | 1 | 0.0   | 0.000,0.000,19.828 | 5.4E-05 | 3.1E-04 | 595.3 |
|             | 2 | 148.6 | 0.004,0.004,17.446 | 1.7E-03 | 2.6E-03 |       |
|             | 3 | 303.6 | 0.032,0.038,14.737 | 1.3E-02 | 1.2E-02 |       |
|             | 4 | 443.5 | 0.030,0.118,11.899 | 2.6E-02 | 3.7E-02 |       |
|             | 5 | 544.1 | 0.148,0.624,9.385  | 1.5E-01 | 1.8     |       |
|             | 6 | 595.3 | 3.852,6.956,10.095 | 2.2     | 2.0     |       |
|             | 7 | 632.7 | 0.829,1.495,18.222 | 4.0E-01 | 6.3E-01 |       |
|             | 8 | 716.3 | 0.078,0.237,19.308 | 5.7E-02 |         |       |
| <b>6-23</b> | 1 | 0.0   | 0.000,0.000,19.835 | 5.2E-05 | 3.5E-04 | 594.4 |
|             | 2 | 148.8 | 0.005,0.005,17.497 | 2.0E-03 | 3.1E-03 |       |
|             | 3 | 302.5 | 0.036,0.042,14.730 | 1.5E-02 | 1.6E-02 |       |
|             | 4 | 442.7 | 0.037,0.131,11.910 | 2.9E-02 | 1.0E-01 |       |
|             | 5 | 543.2 | 0.619,1.178,9.474  | 3.4E-01 | 1.9     |       |
|             | 6 | 594.4 | 3.754,6.947,10.404 | 2.0     | 2.1     |       |
|             | 7 | 637.9 | 0.731,1.227,18.178 | 3.6E-01 | 6.5E-01 |       |
|             | 8 | 714.1 | 0.112,0.343,19.221 | 7.9E-02 |         |       |
| <b>6-25</b> | 1 | 0.0   | 0.000,0.000,19.841 | 4.3E-05 | 5.0E-04 | 583.5 |
|             | 2 | 147.7 | 0.006,0.007,17.572 | 2.5E-03 | 3.9E-03 |       |
|             | 3 | 297.1 | 0.037,0.046,14.738 | 1.6E-02 | 2.1E-02 |       |
|             | 4 | 436.3 | 0.056,0.156,11.906 | 3.7E-02 | 2.2E-01 |       |
|             | 5 | 534.1 | 1.421,2.129,9.513  | 6.8E-01 | 2.0     |       |
|             | 6 | 583.5 | 3.452,6.784,10.706 | 2.1     | 2.2     |       |
|             | 7 | 632.5 | 0.654,1.086,17.957 | 3.4E-01 | 6.6E-01 |       |
|             | 8 | 704.2 | 0.142,0.456,19.144 | 1.0E-01 |         |       |
| <b>6-44</b> | 1 | 0.0   | 0.000,0.000,19.753 | 7.0E-05 | 7.0E-04 | 512.5 |
|             | 2 | 160.7 | 0.010,0.011,14.927 | 3.9E-03 | 8.0E-03 |       |
|             | 3 | 299.7 | 0.097,0.098,14.927 | 3.6E-02 | 4.0E-02 |       |
|             | 4 | 415.9 | 0.203,0.437,11.833 | 1.2E-01 | 2.4E-01 |       |
|             | 5 | 512.5 | 1.863,3.108,8.989  | 9.2E-01 | 2.1     |       |
|             | 6 | 569.7 | 3.524,6.268,11.792 | 2.2     | 2.1     |       |
|             | 7 | 620.7 | 0.330,0.339,19.254 | 1.5E-01 | 5.7E-01 |       |
|             | 8 | 690.1 | 0.078,0.235,19.163 | 6.9E-02 |         |       |
| <b>6-60</b> | 1 | 0.0   | 0.001,0.001,19.545 | 4.0E-04 | 1.4E-03 | 491.0 |
|             | 2 | 140.2 | 0.014,0.017,17.175 | 5.5E-03 | 1.4E-02 |       |
|             | 3 | 297.2 | 0.124,0.131,11.818 | 4.7E-02 | 3.8E-02 |       |
|             | 4 | 402.4 | 0.023,0.311,11.818 | 5.7E-02 | 1.9E-01 |       |

|               |   |       |                    |         |         |       |
|---------------|---|-------|--------------------|---------|---------|-------|
|               | 5 | 491.0 | 1.045,2.474,8.879  | 9.5E-01 | 4.8E-01 |       |
|               | 6 | 532.9 | 11.706,7.585,2.879 | 3.5     | 1.1     |       |
|               | 7 | 579.8 | 0.483,0.633,19.073 | 1.9E-01 | 7.9E-01 |       |
|               | 8 | 672.7 | 0.021,0.211,19.324 | 4.3E-02 |         |       |
| <b>6-72</b>   | 1 | 0.0   | 0.000,0.001,19.330 | 2.1E-04 | 1.8E-03 | 471.3 |
|               | 2 | 122.2 | 0.011,0.014,17.132 | 4.5E-03 | 1.7E-02 |       |
|               | 3 | 285.7 | 0.173,0.182,15.325 | 6.7E-02 | 5.6E-02 |       |
|               | 4 | 390.0 | 0.030,0.506,11.779 | 9.3E-02 | 5.0E-01 |       |
|               | 5 | 471.3 | 1.845,4.755,8.446  | 1.3     | 2.2     |       |
|               | 6 | 503.1 | 1.420,6.874,12.596 | 1.7     | 1.5     |       |
|               | 7 | 535.9 | 0.749,0.867,18.297 | 2.9E-01 | 1.0     |       |
|               | 8 | 641.8 | 0.144,0.462,19.236 | 1.1E-01 |         |       |
| <b>6-85</b>   | 1 | 0.0   | 0.009,0.020,19.027 | 4.8E-03 | 1.3E-02 | 424.1 |
|               | 2 | 92.9  | 0.030,0.058,17.391 | 1.6E-02 | 3.7E-02 |       |
|               | 3 | 239.5 | 0.156,0.208,15.745 | 6.9E-02 | 7.2E-02 |       |
|               | 4 | 351.1 | 0.149,0.275,12.176 | 7.4E-02 | 4.7E-01 |       |
|               | 5 | 424.1 | 0.654,2.977,9.582  | 9.2E-01 | 6.5E-01 |       |
|               | 6 | 447.9 | 12.552,7.302,1.764 | 3.6     | 9.0E-01 |       |
|               | 7 | 493.3 | 0.253,0.878,18.054 | 2.2E-01 | 7.2E-01 |       |
|               | 8 | 635.5 | 0.139,0.349,19.361 | 8.4E-02 |         |       |
| <b>6-129</b>  | 1 | 0.0   | 0.001,0.004,19.766 | 8.9E-04 | 6.0E-03 | 438.8 |
|               | 2 | 66.5  | 0.022,0.032,18.044 | 1.0E-02 | 1.8E-02 |       |
|               | 3 | 209.2 | 0.135,0.186,14.719 | 6.0E-02 | 9.5E-02 |       |
|               | 4 | 353.8 | 0.541,0.993,11.716 | 2.8E-01 | 7.0E-01 |       |
|               | 5 | 438.8 | 3.032,4.501,8.795  | 1.5     | 2.2     |       |
|               | 6 | 490.9 | 2.353,3.503,13.747 | 1.2     | 1.9     |       |
|               | 7 | 531.8 | 0.890,1.413,16.139 | 4.3E-01 | 1.6     |       |
|               | 8 | 592.0 | 0.439,2.000,17.996 | 4.2E-01 |         |       |
| <b>6-156</b>  | 1 | 0.0   | 0.004,0.006,19.782 | 1.7E-03 | 2.7E-03 | 500.0 |
|               | 2 | 89.3  | 0.003,0.009,17.436 | 2.3E-03 | 5.7E-03 |       |
|               | 3 | 253.5 | 0.055,0.072,14.597 | 2.3E-02 | 6.5E-02 |       |
|               | 4 | 410.6 | 0.679,0.826,11.802 | 2.7E-01 | 3.2E-01 |       |
|               | 5 | 500.0 | 0.940,2.079,9.746  | 9.5E-01 | 9.1E-01 |       |
|               | 6 | 559.8 | 0.162,2.328,6.328  | 6.7E-01 | 7.7E-01 |       |
|               | 7 | 606.7 | 10.888,6.678,2.160 | 3.3     | 1.3     |       |
|               | 8 | 668.4 | 0.149,0.820,18.148 | 1.8E-01 |         |       |
| <b>6-438</b>  | 1 | 0.0   | 0.000,0.000,19.987 | 5.2E-05 | 1.4E-04 | 664.3 |
|               | 2 | 154.1 | 0.000,0.005,17.576 | 1.7E-04 | 6.5E-04 |       |
|               | 3 | 322.3 | 0.029,0.029,14.530 | 1.0E-02 | 1.5E-02 |       |
|               | 4 | 483.1 | 0.051,0.101,11.962 | 2.6E-02 | 1.9E-01 |       |
|               | 5 | 592.5 | 1.092,1.345,10.451 | 4.7E-01 | 6.2E-01 |       |
|               | 6 | 664.3 | 1.071,3.477,7.667  | 1.0     | 5.8E-01 |       |
|               | 7 | 713.4 | 9.377,6.364,2.162  | 2.8     | 2.0     |       |
|               | 8 | 763.7 | 0.394,1.198,17.190 | 2.9E-01 |         |       |
| <b>6-481</b>  | 1 | 0.0   | 0.001,0.002,19.809 | 4.2E-04 | 1.0E-03 | 517.5 |
|               | 2 | 96.9  | 0.025,0.003,18.966 | 1.1E-03 | 2.5E-03 |       |
|               | 3 | 223.4 | 0.086,0.100,14.561 | 3.5E-02 | 6.5E-02 |       |
|               | 4 | 383.5 | 0.631,0.735,11.700 | 2.5E-01 | 3.5E-01 |       |
|               | 5 | 479.2 | 0.827,1.059,11.803 | 3.7E-01 | 1.4     |       |
|               | 6 | 517.5 | 1.459,5.750,11.803 | 1.3     | 1.3     |       |
|               | 7 | 565.2 | 0.577,2.725,10.028 | 7.4E-01 | 1.8     |       |
|               | 8 | 603.4 | 1.164,6.134,14.447 | 1.5     |         |       |
| <b>6-1008</b> | 1 | 0.0   | 0.000,0.000,19.816 | 2.2E-04 | 1.8E-03 | 572.9 |
|               | 2 | 214.7 | 0.014,0.015,18.100 | 5.7E-03 | 1.1E-02 |       |
|               | 3 | 303.6 | 0.079,0.108,14.667 | 3.6E-02 | 3.9E-02 |       |
|               | 4 | 423.7 | 0.108,0.255,12.328 | 6.8E-02 | 3.0     |       |

|               |   |       |                    |         |         |       |
|---------------|---|-------|--------------------|---------|---------|-------|
|               | 5 | 497.1 | 0.576,1.218,11.807 | 3.6E-01 | 5.6E-01 |       |
|               | 6 | 572.9 | 1.826,4.399,7.288  | 1.3     | 1.9     |       |
|               | 7 | 661.9 | 0.462,3.420,7.335  | 7.3E-01 | 2.1     |       |
|               | 8 | 718.5 | 1.118,6.632,14.180 | 1.7     |         |       |
| <b>6-1030</b> | 1 | 0.0   | 0.000,0.001,19.884 | 6.7E-05 | 8.7E-04 | 483.2 |
|               | 2 | 222.7 | 0.009,0.010,17.711 | 3.7E-03 | 6.2E-03 |       |
|               | 3 | 307.9 | 0.053,0.068,14.744 | 2.3E-02 | 4.0E-02 |       |
|               | 4 | 404.5 | 0.246,0.352,12.706 | 1.1E-01 | 3.0     |       |
|               | 5 | 483.2 | 0.538,1.254,10.299 | 3.5E-01 | 4.3E-01 |       |
|               | 6 | 574.5 | 1.853,3.759,6.778  | 1.1     | 2.2     |       |
|               | 7 | 662.7 | 2.965,3.866,10.274 | 1.3     | 2.1     |       |
|               | 8 | 738.4 | 0.718,3.149,16.948 | 7.4E-01 |         |       |
| <b>6-1053</b> | 1 | 0.0   | 0.000,0.000,19.934 | 4.5E-05 | 4.1E-04 | 751.4 |
|               | 2 | 253.1 | 0.005,0.006,17.424 | 2.2E-03 | 5.1E-03 |       |
|               | 3 | 373.4 | 0.078,0.089,14.659 | 3.1E-02 | 3.1E-02 |       |
|               | 4 | 477.5 | 0.060,0.211,12.338 | 5.1E-02 | 8.8E-02 |       |
|               | 5 | 567.6 | 0.416,0.597,9.847  | 1.9E-01 | 2.3E-01 |       |
|               | 6 | 665.8 | 0.288,0.686,6.722  | 1.8E-01 | 3.4E-01 |       |
|               | 7 | 751.4 | 6.921,6.133,3.199  | 2.3     | 2.2     |       |
|               | 8 | 824.2 | 0.767,3.518,16.440 | 8.1E-01 |         |       |
| <b>6-1072</b> | 1 | 0.0   | 0.000,0.001,19.939 | 2.8E-05 | 3.6E-04 | 720.1 |
|               | 2 | 223.8 | 0.003,0.003,17.445 | 1.2E-03 | 3.4E-03 |       |
|               | 3 | 350.3 | 0.130,0.142,14.543 | 4.9E-02 | 4.7E-02 |       |
|               | 4 | 457.2 | 0.099,0.332,12.458 | 9.0E-02 | 1.1E-01 |       |
|               | 5 | 547.4 | 0.408,0.811,9.742  | 2.3E-01 | 4.1E-01 |       |
|               | 6 | 641.3 | 1.158,2.260,6.718  | 6.7E-01 | 2.3     |       |
|               | 7 | 720.1 | 3.083,4.163,7.959  | 1.5     | 1.8     |       |
|               | 8 | 779.7 | 0.838,4.018,15.783 | 9.0E-01 |         |       |
| <b>6-1182</b> | 1 | 0.0   | 0.003,0.003,19.942 | 9.4E-04 | 1.2     | 68.9  |
|               | 2 | 68.9  | 0.011,0.019,18.724 | 6.0E-03 | 1.0E-01 |       |
|               | 3 | 227.4 | 0.127,0.144,14.650 | 5.1E-02 | 6.6E-02 |       |
|               | 4 | 389.9 | 0.581,0.716,11.492 | 2.4E-01 | 2.0     |       |
|               | 5 | 475.2 | 3.413,5.259,11.830 | 1.7     | 2.2     |       |
|               | 6 | 517.9 | 0.159,3.031,10.199 | 8.2E-01 | 9.6E-01 |       |
|               | 7 | 569.5 | 1.250,2.436,15.029 | 7.8E-01 | 4.8E-01 |       |
|               | 8 | 638.2 | 0.250,0.560,19.466 | 1.5E-01 |         |       |
| <b>6-1289</b> | 1 | 0.0   | 0.003,0.004,19.807 | 1.2E-03 | 1.8     | 98.8  |
|               | 2 | 98.8  | 0.008,0.012,17.215 | 3.4E-03 | 2.4     |       |
|               | 3 | 272.5 | 0.077,0.095,14.620 | 2.9E-02 | 5.0E-02 |       |
|               | 4 | 423.4 | 0.850,1.019,11.578 | 3.2E-01 | 4.0E-01 |       |
|               | 5 | 510.5 | 2.581,5.094,7.639  | 1.4     | 2.1     |       |
|               | 6 | 563.4 | 2.203,3.439,8.502  | 1.1     | 1.1     |       |
|               | 7 | 616.4 | 0.881,2.406,14.070 | 6.1E-01 | 3.1E-01 |       |
|               | 8 | 708.1 | 0.184,0.568,19.108 | 1.4E-01 |         |       |
| <b>6-1486</b> | 1 | 0.0   | 0.001,0.002,19.776 | 3.9E-04 | 1.6     | 106.7 |
|               | 2 | 106.7 | 0.012,0.016,17.881 | 5.2E-03 | 2.4     |       |
|               | 3 | 266.9 | 0.048,0.067,14.905 | 2.2E-02 | 2.9     |       |
|               | 4 | 402.3 | 0.070,0.265,11.832 | 6.9E-02 | 2.9     |       |
|               | 5 | 493.9 | 2.094,4.291,8.930  | 1.3     | 2.3     |       |
|               | 6 | 529.0 | 1.292,6.600,12.049 | 1.9     | 1.3     |       |
|               | 7 | 559.3 | 0.692,0.879,18.262 | 3.0E-01 | 9.1E-01 |       |
|               | 8 | 671.6 | 0.171,0.484,19.336 | 1.2E-01 |         |       |
| <b>6-1510</b> | 1 | 0.0   | 0.000,0.000,19.653 | 5.7E-05 | 1.8     | 104.7 |
|               | 2 | 104.7 | 0.005,0.006,17.445 | 2.0E-03 | 2.3     |       |
|               | 3 | 269.6 | 0.068,0.075,14.962 | 2.7E-02 | 2.9     |       |
|               | 4 | 404.6 | 0.165,0.380,11.785 | 1.0E-01 | 3.2E-01 |       |

|               |   |        |                    |         |         |       |
|---------------|---|--------|--------------------|---------|---------|-------|
|               | 5 | 501.0  | 2.326,4.569,7.935  | 1.3     | 2.1     |       |
|               | 6 | 539.4  | 1.250,5.835,13.750 | 1.3     | 1.5     |       |
|               | 7 | 554.2  | 0.562,0.927,17.200 | 2.8E-01 | 4.7E-01 |       |
|               | 8 | 658.7  | 0.108,0.417,19.314 | 1.1E-01 |         |       |
| <b>6-1572</b> | 1 | 0.0    | 0.000,0.002,19.799 | 5.1E-04 | 1.7     | 168.3 |
|               | 2 | 168.3  | 0.013,0.005,17.615 | 5.2E-03 | 2.4     |       |
|               | 3 | 308.4  | 0.063,0.080,4.846  | 2.6E-02 | 1.4E-01 |       |
|               | 4 | 415.5  | 0.733,0.961,12.733 | 3.3E-01 | 3.4E-01 |       |
|               | 5 | 476.8  | 0.162,1.531,10.729 | 3.6E-01 | 2.4     |       |
|               | 6 | 558.7  | 6.187,4.420,2.514  | 1.9     | 2.2     |       |
|               | 7 | 635.9  | 2.805,5.433,11.150 | 1.4     | 2.1     |       |
|               | 8 | 715.9  | 0.447,1.538,18.385 | 3.7E-01 |         |       |
| <b>6-1803</b> | 1 | 0.0    | 0.001,0.001,19.868 | 4.4E-04 | 8.4E-04 | 563.6 |
|               | 2 | 116.1  | 0.005,0.007,17.326 | 2.2E-03 | 3.9E-03 |       |
|               | 3 | 295.9  | 0.078,0.096,14.549 | 3.1E-02 | 3.8E-02 |       |
|               | 4 | 451.4  | 0.135,0.255,11.577 | 6.8E-02 | 3.1     |       |
|               | 5 | 563.6  | 2.293,3.214,8.173  | 1.1     | 3.1     |       |
|               | 6 | 610.0  | 9.541,7.135,2.475  | 3.0     | 1.6     |       |
|               | 7 | 655.2  | 0.951,2.077,14.590 | 6.3E-01 | 4.0E-01 |       |
|               | 8 | 730.4  | 0.052,0.457,18.812 | 1.0E-01 |         |       |
| <b>6-1818</b> | 1 | 0.0    | 0.001,0.002,19.806 | 5.9E-04 | 1.0E-03 | 506.8 |
|               | 2 | 90.6   | 0.005,0.008,17.257 | 2.3E-03 | 3.4E-03 |       |
|               | 3 | 259.8  | 0.039,0.051,14.608 | 1.6E-02 | 2.4E-02 |       |
|               | 4 | 406.3  | 0.181,0.293,11.599 | 8.1E-02 | 1.9     |       |
|               | 5 | 506.8  | 7.440,6.212,3.939  | 2.6     | 7.2E-01 |       |
|               | 6 | 551.5  | 1.046,4.802,10.771 | 1.3     | 7.9E-01 |       |
|               | 7 | 603.1  | 0.979,1.869,15.678 | 6.0E-01 | 3.0E-01 |       |
|               | 8 | 684.4  | 0.035,0.274,19.155 | 6.3E-02 |         |       |
| <b>6-1829</b> | 1 | 0.0    | 0.002,0.002,19.818 | 6.8E-04 | 1.2E-03 | 470.8 |
|               | 2 | 86.0   | 0.007,0.011,17.293 | 3.1E-03 | 4.0E-03 |       |
|               | 3 | 241.1  | 0.040,0.056,14.647 | 1.6E-02 | 2.5E-02 |       |
|               | 4 | 376.8  | 0.307,0.397,11.782 | 1.2E-01 | 7.1E-01 |       |
|               | 5 | 470.8  | 3.844,4.795,8.253  | 1.7     | 2.5     |       |
|               | 6 | 512.3  | 1.320,5.299,11.210 | 1.5     | 1.1     |       |
|               | 7 | 553.2  | 1.202,2.842,14.638 | 8.3E-01 | 1.9E-01 |       |
|               | 8 | 646.0  | 0.018,0.112,19.299 | 2.7E-01 |         |       |
| <b>3-1</b>    | 1 | 0.0    | 0.000,0.000,20.027 | 3.5E-06 | 1.4E-05 | 891.9 |
|               | 2 | 295.9  | 0.000,0.000,17.235 | 1.6E-04 | 3.2E-04 |       |
|               | 3 | 497.8  | 0.008,0.009,14.524 | 3.0E-03 | 4.3E-03 |       |
|               | 4 | 652.5  | 0.037,0.053,11.834 | 1.5E-02 | 1.5E-02 |       |
|               | 5 | 784.1  | 0.219,0.291,9.253  | 9.2E-02 | 4.3E-01 |       |
|               | 6 | 891.9  | 3.241,3.369,6.488  | 1.3     | 2.5     |       |
|               | 7 | 972.9  | 2.654,4.770,10.958 | 1.5     | 2.5     |       |
|               | 8 | 1050.6 | 0.459,1.698,17.692 | 4.3E-01 |         |       |
| <b>3-2</b>    | 1 | 0.0    | 0.000,0.000,20.028 | 3.2E-06 | 1.3E-05 | 892.2 |
|               | 2 | 295.7  | 0.000,0.000,17.239 | 1.5E-04 | 3.4E-04 |       |
|               | 3 | 497.3  | 0.009,0.009,14.519 | 3.2E-03 | 4.6E-03 |       |
|               | 4 | 652.4  | 0.035,0.052,11.831 | 1.5E-02 | 1.4E-02 |       |
|               | 5 | 784.1  | 0.158,0.224,9.268  | 6.9E-02 | 4.2E-01 |       |
|               | 6 | 892.3  | 3.150,3.358,6.539  | 1.3     | 2.6     |       |
|               | 7 | 974.2  | 2.746,4.520,10.670 | 1.5     | 2.6     |       |
|               | 8 | 1047.1 | 0.528,2.048,17.450 | 5.4E-01 |         |       |
| <b>3-3</b>    | 1 | 0.0    | 0.000,0.000,20.028 | 2.7E-06 | 1.1E-05 | 892.6 |
|               | 2 | 295.4  | 0.000,0.000,17.244 | 1.4E-04 | 3.4E-04 |       |
|               | 3 | 497.0  | 0.009,0.009,14.517 | 3.2E-03 | 4.7E-03 |       |
|               | 4 | 652.5  | 0.038,0.054,11.831 | 1.6E-02 | 1.3E-02 |       |

|              |   |        |                    |         |         |       |
|--------------|---|--------|--------------------|---------|---------|-------|
|              | 5 | 784.2  | 0.152,0.219,9.278  | 6.8E-02 | 4.2E-01 |       |
|              | 6 | 892.7  | 3.146,3.360,6.577  | 1.2     | 2.6     |       |
|              | 7 | 975.4  | 2.812,4.243,10.438 | 1.4     | 2.6     |       |
|              | 8 | 1044.5 | 0.588,2.375,17.228 | 6.3E-01 |         |       |
| <b>3-14</b>  | 1 | 0.0    | 0.000,0.000,20.017 | 7.1E-06 | 3.8E-05 | 882.1 |
|              | 2 | 290.7  | 0.000,0.001,17.238 | 3.5E-04 | 5.5E-04 |       |
|              | 3 | 495.2  | 0.008,0.009,14.516 | 2.9E-03 | 4.6E-03 |       |
|              | 4 | 654.7  | 0.007,0.025,11.857 | 6.3E-03 | 3.9E-02 |       |
|              | 5 | 781.6  | 0.625,0.705,9.339  | 2.4E-01 | 5.6E-01 |       |
|              | 6 | 882.2  | 2.706,3.214,6.532  | 1.1     | 2.5     |       |
|              | 7 | 954.5  | 2.305,6.155,11.823 | 1.8     | 1.9     |       |
|              | 8 | 1066.2 | 0.199,0.577,18.839 | 1.3E-01 |         |       |
| <b>3-22</b>  | 1 | 0.0    | 0.000,0.000,20.026 | 3.3E-06 | 2.7E-05 | 897.5 |
|              | 2 | 297.2  | 0.000,0.000,17.259 | 2.8E-04 | 4.2E-04 |       |
|              | 3 | 502.8  | 0.008,0.009,14.533 | 3.0E-03 | 4.4E-03 |       |
|              | 4 | 663.4  | 0.016,0.033,11.919 | 8.7E-03 | 2.6E-02 |       |
|              | 5 | 792.2  | 0.294,0.365,9.472  | 1.2E-01 | 2.7E-01 |       |
|              | 6 | 897.5  | 1.929,2.228,6.737  | 8.0E-01 | 2.4     |       |
|              | 7 | 972.9  | 2.754,5.767,11.359 | 1.7     | 1.8     |       |
|              | 8 | 1059.8 | 0.389,1.350,18.160 | 3.1E-01 |         |       |
| <b>3-28</b>  | 1 | 0.0    | 0.000,0.000,20.039 | 1.9E-06 | 1.5E-05 | 924.5 |
|              | 2 | 307.5  | 0.000,0.000,17.290 | 4.1E-05 | 3.9E-04 |       |
|              | 3 | 514.2  | 0.013,0.015,14.492 | 5.1E-03 | 9.3E-03 |       |
|              | 4 | 676.8  | 0.052,0.075,11.991 | 2.4E-02 | 3.4E-02 |       |
|              | 5 | 809.9  | 0.226,0.362,9.511  | 1.1E-01 | 2.8E-01 |       |
|              | 6 | 924.5  | 2.168,2.946,6.830  | 9.8E-01 | 2.6     |       |
|              | 7 | 1016.5 | 4.909,3.343,0.887  | 1.5     | 2.5:    |       |
|              | 8 | 1066.1 | 12.328,8.724,1.257 | 3.6     |         |       |
| <b>3-33</b>  | 1 | 0.0    | 0.000,0.000,20.039 | 1.8E-06 | 1.6E-05 | 936.7 |
|              | 2 | 317.9  | 0.000,0.000,17.295 | 1.3E-05 | 4.6E-04 |       |
|              | 3 | 524.6  | 0.014,0.017,14.492 | 5.6E-03 | 1.0E-2  |       |
|              | 4 | 686.4  | 0.053,0.799,12.022 | 2.4E-02 | 3.5E-02 |       |
|              | 5 | 819.9  | 0.217,0.365,9.534  | 1.1E-01 | 2.4E-01 |       |
|              | 6 | 936.7  | 1.932,2.696,6.886  | 8.8E-01 | 2.2     |       |
|              | 7 | 1030.3 | 5.597,3.502,0.618  | 1.6     | 2.3     |       |
|              | 8 | 1083.9 | 13.426,7.426,1.190 | 3.5     |         |       |
| <b>3-64</b>  | 1 | 0.0    | 0.000,0.000,20.005 | 2.8E-05 | 1.5E-04 | 881.2 |
|              | 2 | 309.5  | 0.003,0.003,17.279 | 1.1E-03 | 1.7E-03 |       |
|              | 3 | 510.3  | 0.023,0.029,14.582 | 9.5E-03 | 1.4E-02 |       |
|              | 4 | 660.8  | 0.056,0.112,11.905 | 3.1E-02 | 7.9E-01 |       |
|              | 5 | 783.5  | 0.736,0.879,9.458  | 2.9E-01 | 3.2     |       |
|              | 6 | 881.2  | 3.214,4.504,6.863  | 1.5     | 2.1     |       |
|              | 7 | 956.4  | 2.212,4.702,12.415 | 1.5     | 2.1     |       |
|              | 8 | 1056.5 | 0.258,0.822,18.352 | 1.9E-01 |         |       |
| <b>3-127</b> | 1 | 0.0    | 0.000,0.000,20.004 | 8.5E-06 | 9.1E-05 | 878.8 |
|              | 2 | 255.6  | 0.001,0.001,17.445 | 4.4E-04 | 6.9E-04 |       |
|              | 3 | 483.2  | 0.009,0.011,14.550 | 3.5E-03 | 6.8E-03 |       |
|              | 4 | 671.7  | 0.065,0.073,11.854 | 2.4E-02 | 3.1     |       |
|              | 5 | 805.6  | 0.029,0.228,10.285 | 6.2E-02 | 8.1E-01 |       |
|              | 6 | 878.8  | 2.332,3.740,9.940  | 1.2E-01 | 1.9     |       |
|              | 7 | 944.1  | 2.472,4.352,13.255 | 1.3     | 1.8     |       |
|              | 8 | 1028.9 | 0.402,1.374,18.482 | 3.0E-01 |         |       |
| <b>3-248</b> | 1 | 0.0    | 0.000,0.000,19.979 | 1.9E-05 | 5.1E-05 | 784.2 |
|              | 2 | 251.8  | 0.001,0.001,17.274 | 3.3E-04 | 8.3E-04 |       |
|              | 3 | 431.2  | 0.016,0.020,14.550 | 6.4E-03 | 1.1E-02 |       |
|              | 4 | 566.8  | 0.186,0.228,11.753 | 7.1E-02 | 9.6E-02 |       |

|   |       |                    |         |         |
|---|-------|--------------------|---------|---------|
| 5 | 689.5 | 0.702,0.987,9.193  | 3.0E-01 | 2.9     |
| 6 | 784.2 | 4.378,5.337,7.659  | 1.9     | 2.6     |
| 7 | 864.1 | 1.798,2.692,13.687 | 9.2E-01 | 6.9E-01 |
| 8 | 939.1 | 0.318,1.029,17.893 | 2.5E-01 |         |

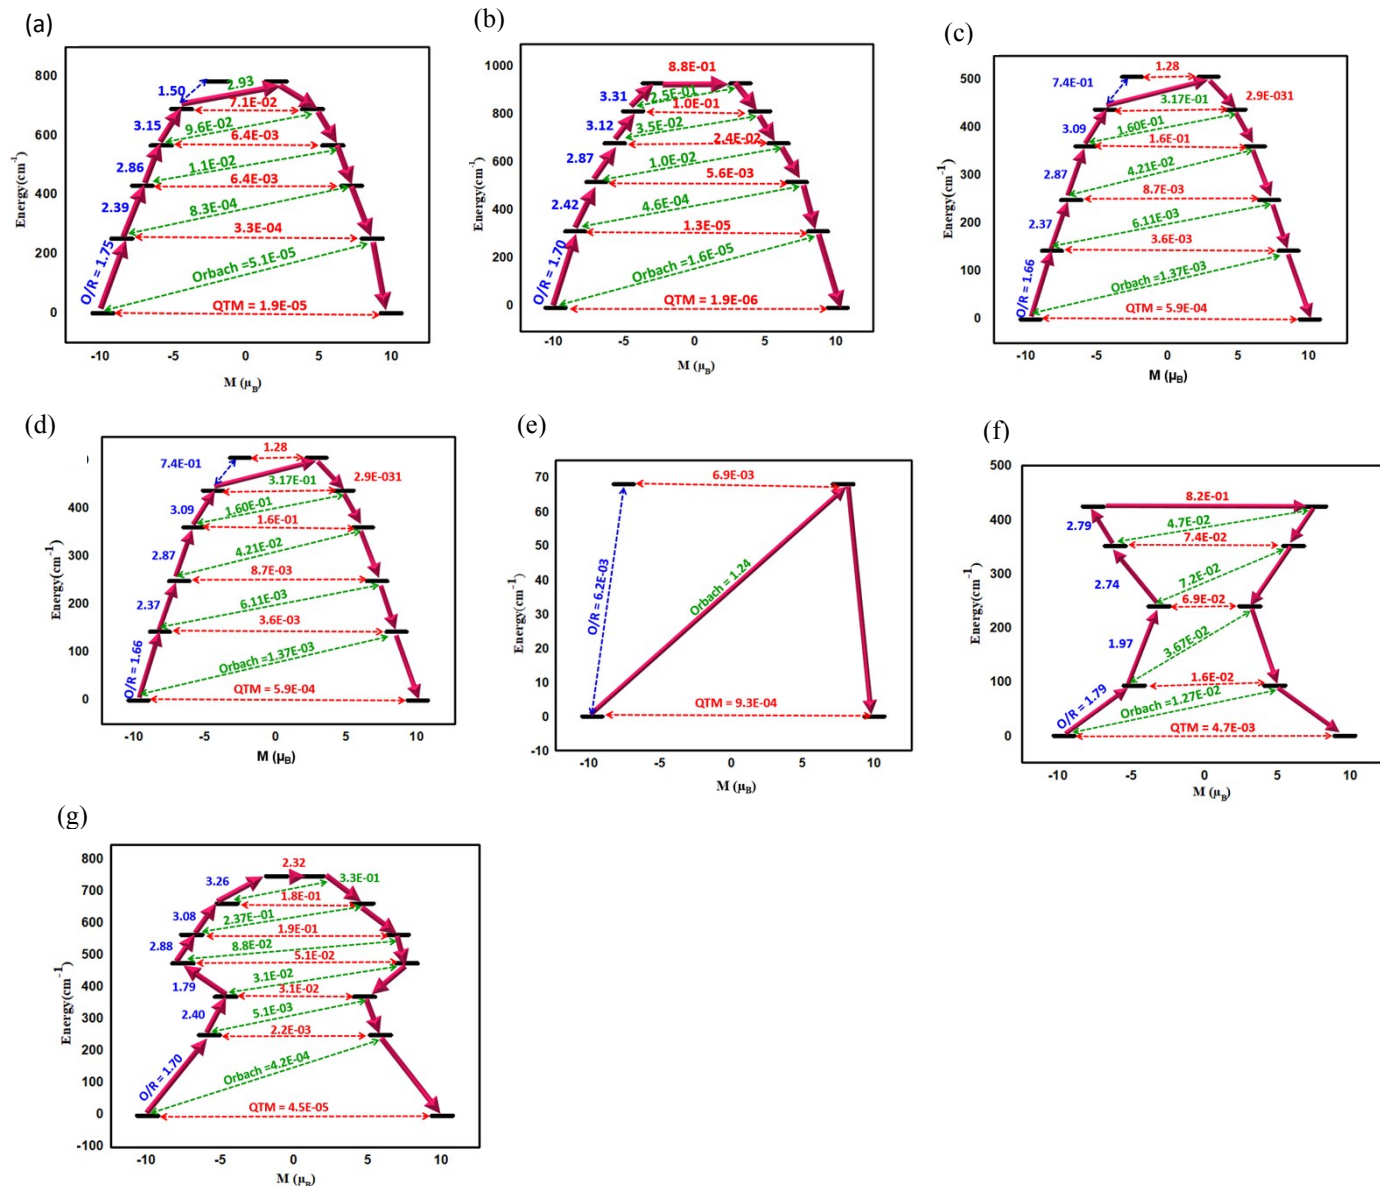

Figure S3. Magnetic blockade diagrams for, (a) 3-10 (b) 3-7 (c) 5-5, (d) 5-1, (e) 6-19, (f) 6-10, (g) 6-17

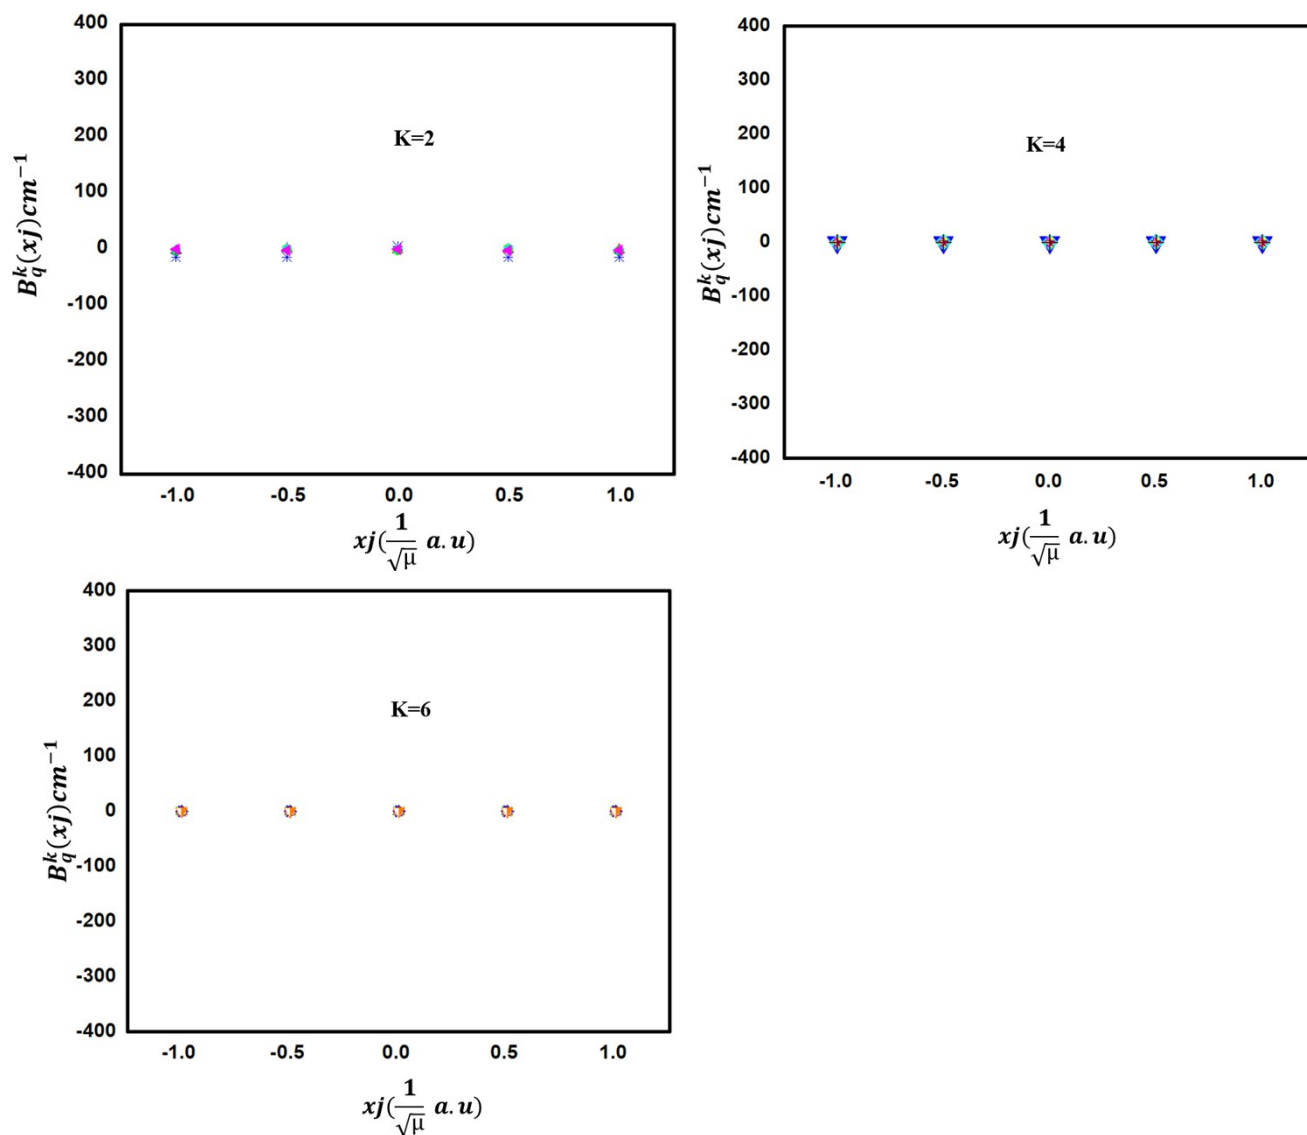

**Figure S4.** Plots showing the crystal field parameters for the complex **3**.

**Table S7.** CASSCF+RASSI-SO computed energies of all low-lying KDs, and SINGLE\_ANISO computed  $g$ -tensors of of **3** at the

displacement,  $\chi_j\left(\frac{1}{\sqrt{\mu_j}}a.u.\right) = 0.00$ , **0.5, 1.0, (-0.5) and (-1.0)** ( Note: Red highlighted KD are those from where relaxation is occurring)

| KDs                                                    | $E(\text{cm}^{-1})$ | $g_{xx}$ | $g_{yy}$ | $g_{zz}$ |
|--------------------------------------------------------|---------------------|----------|----------|----------|
| $\chi_j\left(\frac{1}{\sqrt{\mu_j}}a.u.\right) = 0.00$ |                     |          |          |          |



---

|   |        |       |       |        |
|---|--------|-------|-------|--------|
| 1 | 0.0    | 0.000 | 0.000 | 19.983 |
| 2 | 301.6  | 0.000 | 0.000 | 17.201 |
| 3 | 509.3  | 0.007 | 0.008 | 14.504 |
| 4 | 668.3  | 0.042 | 0.058 | 11.814 |
| 5 | 803.1  | 0.334 | 0.416 | 9.204  |
| 6 | 912.9  | 3.319 | 3.372 | 6.397  |
| 7 | 994.2  | 2.549 | 5.026 | 11.217 |
| 8 | 1505.7 | 0.389 | 1.373 | 17.938 |

$$\chi_j\left(\frac{1}{\sqrt{\mu_j}}a.u.\right) = 0.5$$

|   |        |       |       |        |
|---|--------|-------|-------|--------|
| 1 | 0.0    | 0.000 | 0.000 | 19.976 |
| 2 | 286.9  | 0.002 | 0.002 | 17.189 |
| 3 | 477.4  | 0.043 | 0.047 | 14.386 |
| 4 | 625.2  | 0.226 | 0.292 | 11.766 |
| 5 | 754.6  | 0.802 | 1.331 | 9.091  |
| 6 | 868.7  | 5.976 | 5.155 | 3.021  |
| 7 | 958.6  | 2.428 | 4.755 | 12.209 |
| 8 | 1055.4 | 0.351 | 1.134 | 18.479 |

$$\chi_j\left(\frac{1}{\sqrt{\mu_j}}a.u.\right) = 1$$

|   |       |       |       |        |
|---|-------|-------|-------|--------|
| 1 | 0.0   | 0.000 | 0.000 | 19.962 |
| 2 | 274.9 | 0.015 | 0.023 | 16.955 |
| 3 | 431.1 | 0.184 | 0.209 | 13.926 |
| 4 | 571.6 | 0.477 | 0.771 | 11.276 |

---

---

|                                                          |        |       |       |        |
|----------------------------------------------------------|--------|-------|-------|--------|
| 5                                                        | 718.5  | 1.362 | 2.528 | 8.714  |
| 6                                                        | 848.7  | 3.823 | 5.168 | 7.796  |
| 7                                                        | 960.2  | 2.033 | 3.812 | 13.842 |
| 8                                                        | 1070.1 | 0.332 | 0.979 | 18.870 |
| $\chi_j\left(\frac{1}{\sqrt{\mu_j}}a.u.\right) = (-0.5)$ |        |       |       |        |
| 1                                                        | 0.0    | 0.000 | 0.000 | 19.955 |
| 2                                                        | 285.9  | 0.004 | 0.005 | 17.079 |
| 3                                                        | 473.6  | 0.047 | 0.055 | 14.248 |
| 4                                                        | 618.4  | 0.454 | 0.563 | 11.431 |
| 5                                                        | 743.6  | 2.849 | 3.397 | 8.250  |
| 6                                                        | 851.3  | 4.043 | 4.975 | 9.332  |
| 7                                                        | 969.7  | 1.107 | 1.822 | 15.085 |
| 8                                                        | 1101.2 | 0.121 | 0.313 | 19.213 |
| $\chi_j\left(\frac{1}{\sqrt{\mu_j}}a.u.\right) = (-1.0)$ |        |       |       |        |
| 1                                                        | 0.0    | 0.000 | 0.000 | 19.929 |
| 2                                                        | 271.6  | 0.022 | 0.033 | 16.798 |
| 3                                                        | 428.9  | 0.210 | 0.244 | 13.772 |
| 4                                                        | 568.3  | 0.861 | 1.162 | 11.040 |
| 5                                                        | 706.6  | 3.121 | 4.544 | 7.865  |
| 6                                                        | 835.5  | 3.919 | 4.200 | 10.459 |
| 7                                                        | 976.0  | 1.089 | 1.672 | 15.667 |
| 8                                                        | 1121.4 | 0.141 | 0.341 | 19.415 |

---

Input for optimisation, Molcas and BOMD

Optimisation input

%mem=8000mb

%NProcShared=8

%NProLinda=2

%chk=/home/rajaraman/Tanu/Orca/opti\_orca/opt-Cor6-5.chk

#p UB3LYP/gen opt freq scfcyc=500 gfinput gfoldprinT pseudo=cards

optimisation of opt-Cor6-5

2,8

Gd

|   |              |              |              |
|---|--------------|--------------|--------------|
|   | -1.766900000 | -0.416976000 | -0.339676000 |
| C | -0.587451000 | -1.188944000 | 2.094190000  |
| H | -1.079887000 | -1.836102000 | 2.816439000  |
| C | -0.795992000 | 0.203951000  | 2.217296000  |
| H | -1.436162000 | 0.547663000  | 3.025311000  |
| C | 0.205183000  | 2.574114000  | 1.641427000  |
| H | -0.359056000 | 3.119696000  | 2.391575000  |
| C | 1.277423000  | 3.205065000  | 1.017928000  |
| H | 1.507354000  | 4.225020000  | 1.313950000  |
| C | 3.519729000  | 2.835044000  | -0.278557000 |
| H | 3.917879000  | 3.824749000  | -0.076132000 |
| C | 4.380816000  | 1.861919000  | -0.779615000 |
| H | 5.418720000  | 2.133696000  | -0.949619000 |
| C | 4.773356000  | -0.717749000 | -0.998699000 |
| H | 5.840919000  | -0.638369000 | -1.183224000 |
| C | 4.251580000  | -1.971803000 | -0.689367000 |
| H | 4.929908000  | -2.818464000 | -0.644410000 |
| C | 2.247588000  | -3.201133000 | 0.461197000  |
| H | 2.773277000  | -4.143912000 | 0.586324000  |
| C | 1.049891000  | -3.030238000 | 1.150370000  |
| H | 0.687677000  | -3.838535000 | 1.778234000  |

|   |              |              |              |
|---|--------------|--------------|--------------|
| C | 0.369105000  | -1.753239000 | 1.155120000  |
| C | -0.071765000 | 1.172681000  | 1.411023000  |
| C | 2.161424000  | 2.522028000  | 0.094939000  |
| C | 3.969805000  | 0.485127000  | -0.954257000 |
| C | 2.871332000  | -2.141491000 | -0.305029000 |
| C | 2.079873000  | -1.009261000 | -0.480716000 |
| C | 0.881869000  | -0.817552000 | 0.243699000  |
| C | 0.665351000  | 0.597533000  | 0.365060000  |
| C | 1.733921000  | 1.253860000  | -0.289125000 |
| C | 2.608247000  | 0.264595000  | -0.796668000 |
| C | -4.002827000 | -0.151308000 | -1.689115000 |
| C | -4.392313000 | -0.471114000 | -0.357823000 |
| C | -4.016250000 | 0.612359000  | 0.484024000  |
| C | -3.398442000 | 1.607245000  | -0.330008000 |
| C | -3.393445000 | 1.135715000  | -1.671926000 |
| H | -4.197959000 | -0.751772000 | -2.571174000 |
| H | -4.930661000 | -1.360638000 | -0.048874000 |
| H | -4.229907000 | 0.698328000  | 1.542668000  |
| H | -3.050595000 | 2.577426000  | 0.004130000  |
| H | -3.037930000 | 1.683231000  | -2.538173000 |

CH 0

6-31G\*

\*\*\*\*

Gd 0

SP 3 1.00

17.24000000000000 3.607000091537422E-003 -2.072870013100241E-002

3.346000000000000 0.737570618717857 0.519148703280945

2.429000000000000 -1.71492784352095 -1.48838220940636

SP 1 1.00

0.934900000000000 1.000000000000000 1.000000000000000

SP 1 1.00

0.358800000000000 1.000000000000000 1.000000000000000

SP 1 1.00

8.105000000000000E-002 1.000000000000000 1.000000000000000

D 2 1.00

0.857300000000000 0.305193173183232

0.412800000000000 0.739945149015201

D 1 1.00

0.151900000000000 1.000000000000000

F 6 1.00

77.6000000000000 1.583755898700157E-002

28.6100000000000 9.647586944747537E-002

12.1300000000000 0.235859801924552

5.23900000000000 0.380304259854489

2.30500000000000 0.373451413617453

0.994200000000000 0.241992063517626

F 1 1.00

0.403100000000000 1.000000000000000

\*\*\*\*

Gd 0

Gd1-ECP 3 46

component 1

2

1 13.095090800 -15.786726000

1 2.569738560 -6.127778140

component 2

3

2 2.702265230 -137.902125000

2 2.933477410 208.964540000

0 9.850809640 16.858693600

component 3

3

0 10.256201200 11.130834300

2 2.452732130 131.651321000

2 2.196934270 -77.444300800

component 4

2

2 2.247169230 31.466411800

0 6.430643690 8.345072860

Molcas inputs

Guess orbital

```
&GATEWAY
  Title
    3-Cor-TZVP
  Charge
    2
  Coord
    3-Cor-TZVP.xyz
  Group
  NoSym
  Basis set
  C.ANO-RCC...4s3p2d1f.,H.ANO-RCC...3s2p1d.,Dy.ANO-RCC...8s7p5d3f2g1h.
  ANGM
    -1.766900000    -0.416976000    -0.339676000
  SDIPolar
  AMFI
  Douglas-Kroll
&SEWARD
  Cholesky
&GUESSORB
  PRMO
    3
  PRPopulation
```

RASSCF

```
>export MOLCAS_MOLDEN=ON
```

```
&RASSCF  
Spin  
6  
Inactive  
110  
Nactel  
9 0 0  
Ras2  
7  
Alter  
7  
1 111 101  
1 112 102  
1 113 103  
1 114 104  
1 115 105  
1 116 106  
1 117 107  
CiRoot  
21 21 1
```

RASSI

```
&RASSI  
Nr of JobIph  
1 21  
1 2 3 4 5 6 7 8 9 10 11 12 13 14 15 16 17 18 19 20 21  
Spin  
MEES  
Properties  
3  
'AngMom' 1 'AngMom' 2 'AngMom' 3  
SOProperties  
3  
'AngMom' 1 'AngMom' 2 'AngMom' 3
```

SINGLE\_ANISO

```
&SINGLE_ANISO  
MLTP  
8  
2 2 2 2 2 2 2 2  
CRYS  
Dy  
UBAR  
TINT  
0.0 300 50 1
```

BOMD input

&FORCE\_EVAL

METHOD Quickstep

&DFT

```
BASIS_SET_FILE_NAME /opt/cp2k-2.4.0/cp2k-2.4.0/tests/QS/BASIS_MOLOPT
POTENTIAL_FILE_NAME /opt/cp2k-2.4.0/cp2k-2.4.0/tests/QS/GTH_POTENTIALS
WFN_RESTART_FILE_NAME /home/rajaraman/Tanu/MD-cp2k/Y-Cor6-5-RESTART.wfn
UKS T
CHARGE 3
MULTIPLICITY 1
&MGRID
  NGRIDS 5
  CUTOFF 400
  REL_CUTOFF 60
&END MGRID
&QS
METHOD GAPW
EXTRAPOLATION PS
EXTRAPOLATION_ORDER 4
EPS_DEFAULT 1.0E-8
&END QS
&SCF
  SCF_GUESS RESTART
  EPS_SCF 1.0E-8
  MAX_SCF 300
&MIXING T
  METHOD BROYDEN_MIXING
  ALPHA 0.1
  BETA 1.5
  NBROYDEN 8
&END MIXING
&OUTER_SCF
  EPS_SCF 1.0E-8
  MAX_SCF 100
  OPTIMIZER DIIS
&END OUTER_SCF
&OT ON
```



```

PRECONDITIONER      FULL_KINETIC
MINIMIZER           CG
N_HISTORY_VEC       7
ENERGY_GAP          1.0000000000000000E-04
&END OT
&PRINT
&RESTART
LOG_PRINT_KEY       T
&END RESTART
&END PRINT
&END SCF
&PRINT
&END PRINT
&XC
&XC_GRID
XC_SMOOTH_RHO       NN50
XC_DERIV             NN50_SMOOTH
&END XC_GRID
&XC_FUNCTIONAL      NO_SHORTCUT
&PBE T
PARAMETRIZATION     PBESOL
&END PBE
&END XC_FUNCTIONAL
&VDW_POTENTIAL
POTENTIAL_TYPE      PAIR_POTENTIAL
&PAIR_POTENTIAL
R_CUTOFF            1.6000000000000000E+01
TYPE                DFTD2
SCALING              1.0000000000000000E+00
&END PAIR_POTENTIAL
&END VDW_POTENTIAL
DENSITY_CUTOFF      1.0E-9
GRADIENT_CUTOFF     1.0E-9

```

```

TAU_CUTOFF 1.0E-9
&END XC
&END DFT
&SUBSYS
&TOPOLOGY
&CENTER_COORDINATES T
&END CENTER_COORDINATES
&END TOPOLOGY
&PRINT
&ATOMIC_COORDINATES
&END ATOMIC_COORDINATES
&END PRINT
&CELL
A x 0.000000000 0.000000000
B 0.000000000 x 0.000000000
C 0.000000000 0.000000000 x
PERIODIC XY
&END CELL
&COORD
M x y z
&END COORD
&KIND H
BASIS_SET TZVP-MOLOPT-GTH
POTENTIAL GTH-PBE-q1
&END KIND
&KIND C
BASIS_SET TZVP-MOLOPT-GTH
POTENTIAL GTH-PBE-q4
&END KIND
&KIND Y
BASIS_SET DZVP-MOLOPT-SR-GTH
POTENTIAL GTH-PBE-q11
&END KIND

```

```
&END SUBSYS
&PRINT
  &FORCES OFF
  &EACH
    QS_SCF      0
  &END EACH
&END FORCES
&DISTRIBUTION SILENT
&END DISTRIBUTION
&END PRINT
&END FORCE_EVAL
```

```
&GLOBAL
PROJECT Y-Cor6-5
RUN_TYPE MD
PRINT_LEVEL LOW
&END GLOBAL
```

```
&MOTION
&MD
ENSEMBLE NVT
STEPS 3000
TIMESTEP 1.00
TEMPERATURE 300
&THERMOSTAT
  &NOSE
    TIMECON 50
    LENGTH 3
    YOSHIDA 3
    MTS 2
  &END NOSE
&END THERMOSTAT
&END MD
&PRINT
```

```
&RESTART
LOG_PRINT_KEY T
  &EACH
    MD 50
  &END EACH
ADD_LAST NUMERIC
&END RESTART
&TRAJECTORY
LOG_PRINT_KEY T
  &EACH
    MD 1
  &END EACH
ADD_LAST NUMERIC
&END TRAJECTORY
&VELOCITIES
LOG_PRINT_KEY T
  &EACH
    MD 1
  &END EACH
ADD_LAST NUMERIC
&END VELOCITIES
&END PRINT
&END MOTION
```
